# Supplementary material for: Can we IMPROVE cardiovascular outcomes through phosphate lowering in CKD? Rationale and protocol for the IMpact of Phosphate Reduction On Vascular End-points in Chronic Kidney Disease (IMPROVE-CKD) study
Source: PubMed Central journal article supplement — BMJ Open. 2019 Feb 21;9(2):e024382. doi: 10.1136/bmjopen-2018-024382 (PMC6398689; doi:10.1136/bmjopen-2018-024382), 2019-02-21
Supplement: bmjopen-2018-024382.draft_revisions.pdf [file bmjopen-2018-024382.draft_revisions.pdf]

# BMJ Open

BMJ Open is committed to open peer review. As part of this commitment we make the peer review history of every article we publish publicly available.

When an article is published we post the peer reviewers' comments and the authors' responses online. We also post the versions of the paper that were used during peer review. These are the versions that the peer review comments apply to.

The versions of the paper that follow are the versions that were submitted during the peer review process. They are not the versions of record or the final published versions. They should not be cited or distributed as the published version of this manuscript.

BMJ Open is an open access journal and the full, final, typeset and author-corrected version of record of the manuscript is available on our site with no access controls, subscription charges or pay-per-view fees (<http://bmjopen.bmj.com>).

If you have any questions on BMJ Open's open peer review process please email [editorial.bmjopen@bmj.com](mailto:editorial.bmjopen@bmj.com)

# BMJ Open

## Can we IMPROVE cardiovascular outcomes through phosphate lowering in CKD? - Rationale for the IMPact of Phosphate Reduction On Vascular End-points in Chronic Kidney Disease (IMPROVE-CKD) study

|                               |                                                                                                                                                                                                                                                                                                                                                                                                                                                                                                                                                                                                                                                                                                                                                              |
|-------------------------------|--------------------------------------------------------------------------------------------------------------------------------------------------------------------------------------------------------------------------------------------------------------------------------------------------------------------------------------------------------------------------------------------------------------------------------------------------------------------------------------------------------------------------------------------------------------------------------------------------------------------------------------------------------------------------------------------------------------------------------------------------------------|
| Journal:                      | <i>BMJ Open</i>                                                                                                                                                                                                                                                                                                                                                                                                                                                                                                                                                                                                                                                                                                                                              |
| Manuscript ID                 | bmjopen-2018-024382                                                                                                                                                                                                                                                                                                                                                                                                                                                                                                                                                                                                                                                                                                                                          |
| Article Type:                 | Protocol                                                                                                                                                                                                                                                                                                                                                                                                                                                                                                                                                                                                                                                                                                                                                     |
| Date Submitted by the Author: | 24-May-2018                                                                                                                                                                                                                                                                                                                                                                                                                                                                                                                                                                                                                                                                                                                                                  |
| Complete List of Authors:     | Lioufas, Nicole; Royal Melbourne Hosp, Nephrology; University of Melbourne, Department of Medicine<br>Toussaint, Nigel D.; Royal Melbourne Hosp, Nephrology; University of Melbourne, Department of Medicine<br>Pedagogos, Eugenia; Epworth Healthcare<br>Elder, Grahame; Westmead Hospital, Department of Renal Medicine; Garvan Institute of Medical Research, Osteoporosis and Bone Biology Division<br>Badve, Sunil; St. George Hospital, Department of Nephrology<br>Pascoe, Elaine; University of Queensland, Faculty of Medicine; Australasian Kidney Trials Network<br>Valks, Andrea; Australasian Kidney Trials Network<br>Hawley, Carmel; The University of Queensland, Faculty of Medicine; Princess Alexandra Hospital, Department of Nephrology |
| Keywords:                     | phosphate, mineral metabolism, randomized controlled trial, CKD-MBD, pulse wave velocity, vascular calcification                                                                                                                                                                                                                                                                                                                                                                                                                                                                                                                                                                                                                                             |
|                               |                                                                                                                                                                                                                                                                                                                                                                                                                                                                                                                                                                                                                                                                                                                                                              |

SCHOLARONE™  
Manuscripts

24<sup>th</sup> May 2018

1  
2  
3  
4  
5  
6  
7 Dr Trish Groves

8 Editor-in-Chief, *BMJ Open*

9  
10 BMJ Open Editorial Office, BMA House

11  
12 Tavistock Square, London, WC1H 9JR, UK

13  
14  
15  
16  
17  
18 Dear Dr Groves,

19  
20  
21 We would like to submit the attached manuscript "*Can we IMPROVE cardiovascular*  
22 *outcomes through phosphate lowering in CKD? - Rationale for the IMPact of Phosphate*  
23 *Reduction On Vascular End-points in Chronic Kidney Disease (IMPROVE-CKD) study*" for  
24 publication in BMJ Open. We believe this is an important manuscript because of the paucity  
25 of clinical trials assessing the benefits of treating hyperphosphatemia in patients with chronic  
26 kidney disease (CKD), despite this management being common clinical practice based on  
27 numerous experimental and observational studies suggesting phosphate imbalance as a  
28 cardiovascular risk factor. This manuscript outlines the rationale and protocol for an  
29 international, multi-centre, placebo-controlled randomized trial in pre-dialysis CKD patients  
30 currently being conducted and this paper has not been submitted for publication elsewhere.  
31  
32  
33  
34  
35  
36  
37  
38  
39  
40  
41  
42  
43  
44

45 Yours sincerely,

46  
47  
48  
49 Associate Professor Nigel Toussaint

50  
51 Department of Nephrology, The Royal Melbourne Hospital

52  
53 Grattan Street, Parkville, Victoria 3052, Australia.

## **Title page**

# **Can we IMPROVE cardiovascular outcomes through phosphate lowering in CKD? - Rationale for the Impact of Phosphate Reduction On Vascular End-points in Chronic Kidney Disease (IMPROVE-CKD) study**

Nicole LIOUFAS\*<sup>1,2</sup>, Nigel D TOUSSAINT\*<sup>1,2</sup>, Eugenia PEDAGOGOS<sup>2,3</sup>, Grahame J ELDER<sup>4,5</sup>, Sunil V BADVE<sup>6</sup>, Elaine M PASCOE<sup>7,8</sup>, Andrea VALKS<sup>7,8</sup>, Carmel M HAWLEY<sup>7,8,9</sup>, on behalf of the **IMPROVE-CKD** Writing Committee.

<sup>1</sup>*Department of Nephrology, The Royal Melbourne Hospital, Parkville, Australia,*

<sup>2</sup>*Department of Medicine (RMH), University of Melbourne, Parkville, Australia, <sup>3</sup>Epworth*

*HealthCare, Melbourne, Australia, <sup>4</sup>Department of Renal Medicine, Westmead Hospital,*

*Westmead, Australia, <sup>5</sup>Osteoporosis and Bone Biology Division, Garvan Institute of Medical*

*Research, Darlinghurst, Australia, <sup>6</sup>Department of Nephrology, St. George Hospital, Sydney,*

*Australia, <sup>7</sup>Faculty of Medicine, University of Queensland, Woolloongabba, Australia,*

*<sup>8</sup>Australasian Kidney Trials Network, Brisbane, Australia, <sup>9</sup>Department of Nephrology,*

*Princess Alexandra Hospital, Woolloongabba, Australia.*

**\* Co-primary authors**

**Running head:** IMPROVE-CKD study

**Word count:** Abstract 287 Text 3584

1  
2  
3  
4 **Correspondence:** Associate Professor Nigel Toussaint  
5  
6 Department of Nephrology, The Royal Melbourne Hospital,  
7  
8 Grattan Street, Parkville, Victoria 3052, Australia.  
9  
10 E-mail: [Nigel.Toussaint@mh.org.au](mailto:Nigel.Toussaint@mh.org.au)  
11  
12  
13  
14

15 **Keywords:** arterial compliance, cardiovascular disease, chronic kidney disease, chronic  
16 kidney disease mineral and bone disorder (CKD-MBD), phosphate, vascular calcification  
17  
18  
19  
20  
21  
22  
23  
24  
25  
26  
27  
28  
29  
30  
31  
32  
33  
34  
35  
36  
37  
38  
39  
40  
41  
42  
43  
44  
45  
46  
47  
48  
49  
50  
51  
52  
53  
54  
55  
56  
57  
58  
59  
60

**IMPROVE-CKD investigators:**

Nigel D Toussaint, The Royal Melbourne Hospital, Parkville, Victoria, Australia

Eugenia Pedagogos, Epworth Healthcare, Melbourne, Victoria, Australia

Nicole Lioufas, The Royal Melbourne Hospital, Parkville, Victoria, Australia

Carmel M Hawley, Princess Alexandra Hospital, Brisbane, Queensland, Australia

Grahame J Elder, Westmead Hospital, Westmead, New South Wales, Australia

Elaine M Pascoe, Australasian Kidney Trials Network, Brisbane, Australia

Andrea Valks, Australasian Kidney Trials Network, Brisbane, Australia

Sunil V Badve, St. George Hospital, Sydney, New South Wales, Australia

Geoffrey A Block, Colorado Kidney Care, Denver, United States

Neil C Boudville, Sir Charles Gairdner Hospital, Perth, Western Australia, Australia; and

University of Western Australia, Perth, Western Australia, Australia

Katrina Campbell, Princess Alexandra Hospital, Brisbane, Queensland, Australia

James D Cameron, Monash Medical Centre, Clayton, Victoria, Australia

Sylvia Chen, Epworth Healthcare, Melbourne, Victoria, Australia

Randall J Faull, Royal Adelaide Hospital, Adelaide, South Australia, Australia

Stephen G Holt, The Royal Melbourne Hospital, Parkville, Victoria, Australia

Lai S Hooi, Sultanah Aminah Hospital, Johor Bahru, Malaysia

Dana Jackson, Monash Medical Centre, Clayton, Victoria, Australia

Meg J Jardine, Concord Hospital, Sydney, New South Wales, Australia

David W Johnson, Princess Alexandra Hospital, Brisbane, Queensland, Australia; and

University of Queensland, Brisbane, Queensland, Australia

Peter G Kerr, Monash Medical Centre, Clayton, Victoria, Australia

Kenneth K Lau, Monash Medical Centre, Clayton, Victoria, Australia

Alicia Morrish, Australasian Kidney Trials Network, Brisbane, Australia

Vlado Perkovic, The George Institute, Sydney, New South Wales, Australia

Kevan R Polkinghorne, Monash Medical Centre, Clayton, Victoria, Australia

Carol A Pollock, Royal North Shore Hospital, Sydney, New South Wales, Australia

Donna Reidlinger, Australasian Kidney Trials Network, Brisbane, Australia

Laura Robison, Australasian Kidney Trials Network, Brisbane, Australia

Edward R Smith, The Royal Melbourne Hospital, Parkville, Victoria, Australia

Robert J Walker, Dunedin Hospital, Dunedin, New Zealand

Angela Yee Moon Wang, University of Hong Kong, Queen Mary Hospital, Hong Kong

## Abstract

**Introduction:** Further understanding abnormalities of bone and mineral metabolism in chronic kidney disease (CKD) should lead to strategies to reduce cardiovascular risk in the CKD population; however, there is a paucity of large randomized controlled clinical trials to guide appropriate management. Positive associations between serum phosphate and fibroblast growth factor 23 (FGF-23) and cardiovascular morbidity and mortality in both the general and CKD populations have resulted in clinical guidelines recommending management of hyperphosphatemia in patients with CKD, targeting normal serum phosphate levels, although very few studies have addressed clinical outcomes using interventions to improve phosphate control in a randomized and placebo-controlled fashion. Early preventive measures to reduce the development and progression of vascular calcification, left ventricular hypertrophy, and arterial stiffness are crucial in patients with CKD.

**Methods and Analysis:** We outline the rationale and protocol for an international, multi-centre, randomized parallel-group trial assessing the impact of the non-calcium-based phosphate binder, lanthanum carbonate, compared to placebo on surrogate markers of cardiovascular disease in a pre-dialysis CKD population – the IMPROVE-CKD study. The primary objective of the IMPROVE-CKD study is to determine if use of lanthanum carbonate reduces the burden of cardiovascular disease in patients with CKD stages 3b and 4 when compared to placebo. The primary end-point of the study is change in arterial compliance measured by pulse wave velocity over a 96-week period. Secondary outcomes include change in aortic calcification and biochemical parameters of serum phosphate, parathyroid hormone and FGF-23 levels.

**Ethics and Dissemination:** Ethical approval for the IMPROVE-CKD trial was obtained by each local Institutional Ethics Committee for all 17 participating sites in Australia, New

1  
2  
3  
4 Zealand and Malaysia prior to study commencement. Results of this clinical trial will be  
5  
6 published in peer-reviewed journals and presented at conferences.  
7  
8  
9

10 **IMPROVE-CKD registration number** ACTRN12610000650099  
11

## 12 **Strengths and limitations of this study**

13  
14

- 15  
16  
17  
18 • To the best of our knowledge, this international clinical trial will be the largest cohort  
19  
20 and longest in study duration for a randomized, placebo-controlled trial assessing  
21  
22 phosphate binders in a pre-dialysis chronic kidney disease (CKD) population.  
23  
24
- 25  
26 • This study assesses potential effects of phosphate lowering on arterial compliance,  
27  
28 aortic calcification and left ventricular mass; and study findings will provide support  
29  
30 for the current hypothesis that phosphate binders and control of hyperphosphatemia  
31  
32 may mitigate adverse cardiovascular outcomes in patients with CKD.  
33  
34
- 35  
36 • This study uses lanthanum carbonate, a non-calcium-based phosphate binder, which  
37  
38 allows for more accurate assessment of the effect of phosphate binding strategies on  
39  
40 vascular calcification (without the complication of an exogenous calcium load) and  
41  
42 may provide evidence to help inform guidelines that currently lack strong evidence  
43  
44 for phosphate control in pre-dialysis CKD.
- 45  
46 • In addition, the IMPROVE-CKD study will provide valuable information regarding  
47  
48 the relationship between phosphate, FGF-23, and arterial compliance and  
49  
50 calcification in patients with CKD.  
51  
52  
53  
54  
55  
56  
57  
58  
59  
60



- Limitations to this trial may include potential difficulty in recruitment of a large CKD population to a study assessing the use of thrice-daily phosphate binding agents, and possible lack of adherence to study medication over a 96-week period.

For peer review only

1  
2  
3  
4 'Chronic Kidney Disease - Mineral Bone Disorder' (CKD-MBD) has been accepted  
5 terminology in nephrology research and clinical practice for more than a decade. This clinical  
6 syndrome encompasses intimately related abnormalities of mineral homeostasis, bone  
7 turnover and mineralization, and vascular and soft tissue calcification, which are almost  
8 universal in patients with advanced chronic kidney disease (CKD). CKD-MBD is a complex  
9 and evolving area for which international clinical guidelines have been published to provide  
10 suggestions and recommendations on management (1). Just as importantly, these guidelines  
11 highlight the paucity of clinical studies supporting suggested biochemical targets, and the  
12 lack of evidence-based treatment strategies aimed at reducing the risks of fracture,  
13 cardiovascular disease and mortality or improving quality of life for individuals with CKD.  
14  
15  
16  
17  
18  
19  
20  
21  
22  
23  
24  
25  
26  
27  
28

29 Patients with CKD have significantly increased risks of cardiovascular disease and all-cause  
30 mortality compared to the general population (2), and traditional and CKD-specific risk  
31 factors contribute to this risk (3). Abnormalities of bone and mineral metabolism, and in  
32 particular abnormal values of serum phosphate, calcium, parathyroid hormone (PTH) and  
33 fibroblast growth factor 23 (FGF-23), are considered important however few strong  
34 recommendations for treatment of these values exist beyond normalising serum phosphate  
35 and lowering PTH to an indeterminate target (1). Minimizing exogenous calcium through  
36 reducing exposure to calcium-based phosphate binders within the CKD population has also  
37 been suggested to be beneficial, citing meta-analyses showing mortality benefits of non-  
38 calcium containing phosphate binders over calcium-based binders (4, 5), but placebo-  
39 controlled studies are lacking.  
40  
41  
42  
43  
44  
45  
46  
47  
48  
49  
50  
51  
52  
53  
54  
55  
56  
57  
58  
59  
60

1  
2  
3  
4 Whilst observational studies show associations between higher serum phosphate levels and  
5 worse clinical outcomes, causality has never been demonstrated. Serum phosphate provides a  
6 poor measure of overall phosphate balance or the risk of soft tissue calcification in patients  
7 with CKD, and benefits of phosphate-lowering are yet to be demonstrated. Whether a target  
8 level of serum phosphate will assist in attaining improved outcomes remains controversial  
9 and no randomized controlled trial (RCT) to date has proved that lowering extracellular  
10 phosphate improves clinical outcomes. The IMPROVE-CKD (IM P act of P hosphate  
11 R e d u c t i o n V a s c u l a r e n d - p o i n t s Chronic K i d n e y D i s e s e s e study is a placebo-controlled  
12 RCT assessing the potential effects of lanthanum carbonate, a non-calcium-based phosphate  
13 binder, on surrogate markers of cardiovascular disease in patients with CKD. Here, we  
14 discuss the rationale and study design of this important trial.  
15  
16  
17  
18  
19  
20  
21  
22  
23  
24  
25  
26  
27  
28  
29  
30

### 31 ***Rationale for a clinical trial***

32  
33  
34 Epidemiological studies in the general population and in patients with CKD have consistently  
35 shown that serum phosphate levels within and above the upper normal range are  
36 independently and positively correlated with all-cause mortality (6). In patients with CKD,  
37 cardiovascular mortality, arterial stiffness and progression of renal impairment have also been  
38 correlated with higher serum phosphate (7, 8). Positive phosphate balance is known to  
39 contribute to rising PTH and FGF-23 values, which in turn, have also been associated with  
40 adverse clinical outcomes (9, 10). Thus, it is biologically plausible that therapeutic strategies  
41 aimed at reducing phosphate balance and serum phosphate values in patients with CKD  
42 might be beneficial. Dietary phosphate absorption is one modifiable determinant of phosphate  
43 balance and pilot studies that have evaluated phosphate binders, low phosphate diet, or  
44 nicotinamide (which inhibits intestinal sodium-dependent phosphate co-transport) in patients  
45  
46  
47  
48  
49  
50  
51  
52  
53  
54  
55  
56  
57  
58  
59  
60

1  
2  
3  
4 with CKD have shown a reduction of dietary phosphate absorption, serum phosphate and  
5 FGF-23 levels (11). However, evidence for the benefit of such strategies on surrogates for  
6 cardiovascular disease or for CKD progression remains elusive.  
7  
8  
9

10  
11  
12  
13 Abnormal mineral metabolism, with alterations in the regulation of calcium, phosphate and  
14 FGF-23, is also associated with the development of vascular calcification (12). Although  
15 mechanisms leading to vascular calcification are incompletely understood, hypotheses  
16 include a maladaptive repair response to vascular and endothelial damage (13), and  
17 enhancement of concentration-dependent calcium-phosphate precipitation and extracellular  
18 matrix deposition due to elevated phosphate levels. Studies also report coronary artery  
19 calcification associated with elevated FGF-23 values independent of serum phosphate (10,  
20 14), although this association is not a consistent finding (15). In addition to abnormalities of  
21 mineral metabolism, exogenous calcium has been associated with the development and  
22 progression of vascular calcification in patients with CKD. A meta-analysis of phosphate  
23 binders by Jamal *et al*, analysing 14 RCTs, reported a reduction in mortality associated with  
24 the use of non-calcium containing phosphate binders (4). A more recent meta-analysis of 25  
25 eligible studies showed a reduction in all-cause mortality with sevelamer versus calcium-  
26 based binders (5). This difference is potentially related to a positive calcium balance in  
27 patients prescribed calcium-based phosphate binders leading to increasing vascular  
28 calcification. Another meta-analysis reviewed the individual contribution of available non-  
29 calcium-based phosphate binders, and reported that current data are more robust for  
30 sevelamer than for lanthanum or iron-based binders (16).  
31  
32  
33  
34  
35  
36  
37  
38  
39  
40  
41  
42  
43  
44  
45  
46  
47  
48  
49  
50  
51  
52  
53  
54  
55  
56  
57  
58  
59  
60

1  
2  
3  
4 The recently updated Kidney Disease Improving Global Outcomes (KDIGO) CKD-MBD  
5 Guidelines (17) highlighted the lack of trial data demonstrating that lowering serum  
6 phosphate improved patient-centred outcomes. In fact, the evidence for any phosphate-  
7  
8 lowering intervention is only based on epidemiological studies and biological plausibility.  
9  
10 Although several recent historical cohort analyses (DOPPS, ArMORR and COSMOS)  
11  
12 suggested that the prescription of phosphate binders to dialysis patients improved survival  
13  
14 (18-20), these reports were not included in the evidence review for the updated KDIGO  
15  
16 Guidelines. However, a recent RCT comparing calcium and non-calcium-based phosphate  
17  
18 binders with placebo in 148 patients with CKD stages 3-4 (21) was included in the guideline  
19  
20 update review and reported a minimal reduction of serum phosphate in the active treatment  
21  
22 groups, no overall effect on FGF-23 and increases in coronary artery calcification for the  
23  
24 combined phosphate binder groups (predominantly associated with the calcium-based binder  
25  
26 arm).  
27  
28  
29  
30  
31  
32  
33  
34

35 Similarly, two placebo-controlled RCTs of phosphate-lowering in pre-dialysis CKD have  
36  
37 also failed to support the benefit of phosphate-lowering in this population (Table 1). Chue *et*  
38  
39 *al.* found no significant differences between sevelamer and placebo with regard to left  
40  
41 ventricular mass, systolic and diastolic function, or pulse wave velocity (PWV) in 109  
42  
43 patients with CKD after 40 weeks, although only 56% of subjects took  $\geq 80\%$  of the  
44  
45 prescribed therapy (22). In the adherent subgroup, treatment with sevelamer was associated  
46  
47 with lower urinary excretion of phosphate and serum FGF-23, although binder use was not  
48  
49 associated with cardiovascular outcomes of interest such as left ventricular hypertrophy or  
50  
51 arterial compliance. In a smaller study of 38 CKD patients, Seifert *et al.* reported no  
52  
53 differences between lanthanum or placebo over 12 months with respect to serum or urinary  
54  
55  
56  
57  
58  
59  
60

1  
2  
3  
4 phosphate, or surrogate cardiovascular markers of PWV, carotid artery intima-media  
5  
6 thickness or vascular calcification (23). These results question the efficacy and safety of  
7  
8 phosphate binders in this population and the updated KDIGO guidelines have amended a  
9  
10 previous recommendation statement to maintain serum phosphate in the normal range for  
11  
12 patients with CKD stages 3-5 to now suggest that treatment should focus on patients with  
13  
14 overt hyperphosphatemia, although this recommendation is still based on weak clinical  
15  
16 evidence.  
17  
18  
19  
20  
21

22  
23 Currently there are two relevant RCTs in progress (Table 1). The COMBINE (CKD Optimal  
24  
25 Management With BInders and Nicotinamide) study assesses the effects of lowering serum  
26  
27 phosphate and FGF-23 levels in patients with CKD stages 3-4 (11). This study aims to recruit  
28  
29 200 participants and evaluate the use of nicotinamide and lanthanum carbonate in a double-  
30  
31 blind, placebo-controlled trial over 12 months. The primary aim of COMBINE is the safety  
32  
33 and biochemical efficacy of these phosphate-lowering agents, although assessments of  
34  
35 circulating biomarkers of bone and mineral metabolism and magnetic resonance imaging  
36  
37 (MRI) of intermediate measures of cardiovascular disease will also be measured. Enrolment  
38  
39 for this RCT began in 2015 with results expected in 2018. We have also commenced a large  
40  
41 multi-centre RCT, the IMPROVE-CKD study, to investigate the role of phosphate binders in  
42  
43 early stages of CKD. This trial, conducted over a longer period and with a larger cohort, aims  
44  
45 to assess potential effects of phosphate lowering on arterial compliance, vascular calcification  
46  
47 and left ventricular mass.  
48  
49  
50  
51  
52  
53  
54  
55  
56  
57  
58  
59  
60

Table 1. Placebo-controlled RCTs of phosphate lowering in patients with CKD stage 3-5 not on dialysis

| Study                                 | Population                                           | Intervention                                                              | Finding                                                                                                                     |
|---------------------------------------|------------------------------------------------------|---------------------------------------------------------------------------|-----------------------------------------------------------------------------------------------------------------------------|
| Block <i>et al</i><br>(PNT)(21)       | 148 patients<br>CKD3-4                               | Lanthanum carbonate,<br>sevelamer carbonate,<br>calcium acetate           | Reduced urinary phosphate and serum phosphate;<br>Promotion of vascular calcification with binders;<br>No difference in PWV |
| Chue <i>et al</i><br>(CRIB-PHOS)(22)  | 120 patients<br>CKD3 non-diabetic                    | Sevelamer carbonate vs placebo                                            | Lower urinary phosphate and FGF-23 (later in compliant patients)                                                            |
| Seifert <i>et al</i> (23)             | 38 patients<br>CKD3                                  | Lanthanum vs placebo                                                      | No differences in serum/urine phosphate, PWV, carotid IMT, vascular calcification                                           |
| Isakova <i>et al</i><br>(COMBINE)(11) | Aimed recruitment of<br>200 patients<br>CKD3-4       | Lanthanum vs lanthanum +<br>nicotinamide vs<br>nicotinamide vs<br>placebo | Ongoing                                                                                                                     |
| IMPROVE-CKD                           | Aimed recruitment of<br>488 patients<br>with CKD3b-4 | Lanthanum vs placebo                                                      | Ongoing                                                                                                                     |

1  
2  
3  
4 Abbreviations: IMT, intimal medial thickness; PWV, pulse wave velocity; PNT, Phosphate  
5 Normalisation Trial; CRIB-PHOS, Chronic Renal Impairment in Birmingham – Phosphate study;  
6 COMBINE, CKD Optimal Management With Binders and Nicotinamide study; IMPROVE-CKD,  
7 Impact of Phosphate Reduction On Vascular End-Points in CKD  
8  
9

## 10 11 12 13 14 15 16 **Overview of the IMPROVE-CKD Study**

### 17 18 19 ***Study aims***

20  
21  
22 The primary objective of the IMPROVE-CKD study is to determine if use of the non-  
23 calcium-based phosphate binder lanthanum carbonate reduces the burden of cardiovascular  
24 disease in patients with CKD stages 3b and 4 when compared to placebo. The primary end-  
25 point of the study is change in arterial compliance measured by PWV over a 96-week period.  
26  
27 Secondary outcomes include change in aortic calcification and biochemical parameters of  
28 serum phosphate, PTH and FGF-23 levels.  
29  
30  
31  
32  
33  
34  
35  
36  
37  
38

### 39 40 ***Study design and setting***

41  
42 The IMPROVE-CKD study is an investigator-led, prospective, double-blind, randomized  
43 placebo-controlled parallel-group trial. Figure 1 demonstrates the overall study design.  
44  
45 Ethical approval for the IMPROVE-CKD trial was obtained by each local Institutional Ethics  
46 Committee (IEC) for each participating site prior to study commencement. This study is  
47  
48 being conducted in accordance with the Declaration of Helsinki, the National Health and  
49  
50 Medical Research Committee (NHMRC) statement on Human Experimentation, Joint  
51  
52 NHMRC/AVCC statement and Guidelines on Practical Research, applicable ICH guidelines  
53  
54  
55  
56  
57  
58  
59  
60



1  
2  
3  
4 and the Therapeutic Goods Administration (TGA). The trial is registered with the Australia  
5  
6 and New Zealand Clinical Trial Register (ACTRN12610000650099).  
7  
8  
9  
10

### 11 ***Patients and public involvement***

12  
13 Patients and the public were not involved in the development of this study protocol; however  
14 patients are involved in the recruitment to and conduct of the study. The IMPROVE-CKD  
15  
16 study includes patients from 17 nephrology sites in Australia, New Zealand and Malaysia  
17  
18 with CKD stage 3b and stage 4, aged over 18 years old, and who have a serum phosphate  
19  
20 level over 1.00 mmol/L (3.10 mg/dL) on at least one occasion in the 6 months prior to  
21  
22 randomization (Table 2). Patient recruitment commenced in 2012, with a plan to enrol 488  
23  
24 participants for a 96-week study period. During the recruitment phase of the study, changes  
25  
26 were made to the inclusion and exclusion criteria in order to improve feasibility and  
27  
28 generalizability of the trial. The changes and rationale are documented in Table 3.  
29  
30  
31  
32  
33  
34  
35  
36  
37  
38  
39  
40  
41  
42  
43  
44  
45  
46  
47  
48  
49  
50  
51  
52  
53  
54  
55  
56  
57  
58  
59  
60

Table 2. Inclusion and Exclusion Criteria for the IMPROVE-CKD study

|                                                                                                                                                                                                                                                                                                                                                                                                                                                                                                                                                                                                                                                                                                                                                                                                                                                                                                                                                                       |
|-----------------------------------------------------------------------------------------------------------------------------------------------------------------------------------------------------------------------------------------------------------------------------------------------------------------------------------------------------------------------------------------------------------------------------------------------------------------------------------------------------------------------------------------------------------------------------------------------------------------------------------------------------------------------------------------------------------------------------------------------------------------------------------------------------------------------------------------------------------------------------------------------------------------------------------------------------------------------|
| <p><b>Inclusion criteria</b></p> <ol style="list-style-type: none"><li>1. Patients with CKD stages 3b and 4 (eGFR between 15 and 45 ml/min/1.73m<sup>2</sup>)*</li><li>2. Serum phosphate &gt; 1.00 mmol/L (3.10 mg/dL) on at least one occasion in the previous 6 months</li><li>3. 18 years or over</li><li>4. Able to give informed consent</li></ol>                                                                                                                                                                                                                                                                                                                                                                                                                                                                                                                                                                                                              |
| <p><b>Exclusion criteria</b></p> <ol style="list-style-type: none"><li>1. Patients with a history of psychological illness or condition which interferes with their ability to understand or comply with the requirements of the study</li><li>2. Renal transplantation</li><li>3. Recent (within 1 month) hospitalization or cardiovascular event</li><li>4. Pregnancy or breast feeding</li><li>5. Medical conditions that impact on phosphate metabolism (apart from CKD), e.g. primary hyperparathyroidism or hypoparathyroidism; previous subtotal parathyroidectomy; gastrointestinal malabsorption disorders such as Crohn's disease, ulcerative colitis, coeliac disease or severe liver dysfunction</li><li>6. Malnutrition, defined as serum albumin &lt; 30 g/L</li><li>7. Serum phosphate ≤ 0.8 mmol/L (2.48 mg/dL) at screening</li><li>8. Atrial fibrillation as documented on ECG performed at screening</li><li>9. Inability to perform PWV</li></ol> |

\*eGFR determined using the CKD-Epidemiology Collaboration (CKD-EPI) equation

Abbreviations: CKD, chronic kidney disease; ECG, electrocardiogram; eGFR, estimated glomerular filtration rate

Table 3. Protocol amendments for the IMPROVE-CKD study

|                                      |                                                                                                                                                                                                                                                                                                                                                                                                                                                                                                           |                                                                                                                                                                                                                                                                                                                                                                                                                                                                                                                                                                             |                                                                                                                                                                                                                                                                                                                                                                                                                                                                                                                    |
|--------------------------------------|-----------------------------------------------------------------------------------------------------------------------------------------------------------------------------------------------------------------------------------------------------------------------------------------------------------------------------------------------------------------------------------------------------------------------------------------------------------------------------------------------------------|-----------------------------------------------------------------------------------------------------------------------------------------------------------------------------------------------------------------------------------------------------------------------------------------------------------------------------------------------------------------------------------------------------------------------------------------------------------------------------------------------------------------------------------------------------------------------------|--------------------------------------------------------------------------------------------------------------------------------------------------------------------------------------------------------------------------------------------------------------------------------------------------------------------------------------------------------------------------------------------------------------------------------------------------------------------------------------------------------------------|
| <b>Issue and version of protocol</b> | Albuminuria/Proteinuria; Changes between Protocol versions 1.0 to 2.0                                                                                                                                                                                                                                                                                                                                                                                                                                     | Serum phosphate level; Changes between Protocol versions 1.0 to 2.0 to 3.0                                                                                                                                                                                                                                                                                                                                                                                                                                                                                                  | Pulse wave velocity; Changes between Protocol versions 2.0 to 3.0                                                                                                                                                                                                                                                                                                                                                                                                                                                  |
| <b>Protocol amendment</b>            | Initial inclusion criteria were urine albumin/creatinine ratio (ACR) >10mg/mmol or protein/creatinine ratio (PCR) >15mg/mmol.<br><br>These criteria were subsequently removed.                                                                                                                                                                                                                                                                                                                            | Inclusion criterion was initially for serum phosphate level >1.2mmol/L (3.72mg/dL) at screening, but was changed to >1.2mmol/L on at least one occasion over the previous 6 months.<br><br>The serum phosphate level was then subsequently reduced from >1.2mmol/L to >1.0mmol/L (3.10mg/dL) on at least one occasion over the previous 6 months.                                                                                                                                                                                                                           | Exclusion criterion was added as inability to obtain a PWV measure.                                                                                                                                                                                                                                                                                                                                                                                                                                                |
| <b>Rationale for change</b>          | The initial introduction of these criteria was to increase the proportion of CKD 3b/4 subjects who were at greater risk of cardiovascular disease as well as increased risk of progression of renal impairment. Review of screening logs showed that albuminuria/proteinuria were the commonest exclusion criteria, therefore these were removed as they were not considered essential, posed a significant impediment to recruitment, and the population for recruitment was already deemed at increased | The window for serum phosphate results to screen eligible patients was initially changed to be within the previous 6 months due to fluctuations above and below levels of 1.2mmol/L. This change was made to improve study recruitment by broadening the population of suitable participants. Trial screening log review continued to show that this inclusion criterion was a major barrier to patient eligibility for the study and therefore the level was reduced to 1.0mmol/L. This change was not thought to adversely affect the study outcomes because although the | As the trial progressed, a small percentage of the population was noted on whom a PWV reading could not be obtained. This was therefore added as an exclusion criterion in order to ensure the power of the study is not compromised by including individuals whose PWV is unattainable at screening. It is increasingly recognised that even for experienced operators, there is a small percentage of the population on whom PWV cannot be obtained. This has been documented on other studies. <sup>44-46</sup> |

|  |                                                                                                                                                                                                                                                                                                    |                                                                                                                                                                                                                                                                                                                                                                      |  |
|--|----------------------------------------------------------------------------------------------------------------------------------------------------------------------------------------------------------------------------------------------------------------------------------------------------|----------------------------------------------------------------------------------------------------------------------------------------------------------------------------------------------------------------------------------------------------------------------------------------------------------------------------------------------------------------------|--|
|  | <p>cardiovascular risk regardless of albuminuria/proteinuria. Also, for this study, pulse wave velocity (PWV) is the primary surrogate end point and there is only one publication which links albuminuria/proteinuria to PWV, so this association is not considered significant.<sup>43</sup></p> | <p>study is using a phosphate binder as an intervention, the primary purpose of the study is the attenuation of cardiovascular outcomes. A lower phosphate level was added as an exclusion criterion to ensure that patients with very low phosphate levels are not included into the study where further phosphate reduction may adversely affect their health.</p> |  |
|--|----------------------------------------------------------------------------------------------------------------------------------------------------------------------------------------------------------------------------------------------------------------------------------------------------|----------------------------------------------------------------------------------------------------------------------------------------------------------------------------------------------------------------------------------------------------------------------------------------------------------------------------------------------------------------------|--|

### ***Experimental intervention***

Lanthanum carbonate (Fosrenol) is a commercial product of Shire Pharmaceuticals for the treatment of hyperphosphatemia (24). Upon ingestion, lanthanum ions are released from the carbonate as a result of gastric acid secretion in the upper gastrointestinal tract and bind to dietary phosphate. The compound lanthanum phosphate is insoluble and lanthanum carbonate has been shown to effectively reduce the absorption of dietary phosphate in the CKD population. In comparison to calcium-based phosphate binders, lanthanum carbonate has additional benefits of reduced incident hypercalcemia (25). Lanthanum has been studied in both pre-dialysis and dialysis patients, with significant reduction in serum phosphate in both patient groups.

### ***Treatment randomisation***

Participants are randomized 1:1 to two arms involving lanthanum carbonate 500mg three times daily with meals or matching placebo three times daily with meals for 96 weeks. Study medication is up-titrated to a total dose of six tablets daily (3000mg/day lanthanum carbonate) if serum phosphate remains persistently greater than 1.60 mmol/L (4.95 mg/dL). Randomization is stratified for age, presence of diabetes, study site and CKD stage and implemented via web-based access to a central electronic randomization system provided by The George Institute in Sydney, Australia.

### ***Study procedures***

Patients who meet the eligibility criteria and provide written informed consent undergo a baseline visit. A site screening log records the number of participants screened who are

1  
2  
3  
4 potentially eligible to participate and the reasons for ineligibility and for non-participation if  
5 eligible. Potentially eligible participants already receiving a phosphate binder at screening  
6 undergo a 2-week washout period before attending the baseline visit. Tables 4 and 5 outline  
7  
8 the study schedule visits and laboratory outcome measures for the 96-week trial.  
9  
10  
11  
12  
13  
14

15  
16 The IMPROVE-CKD study is being overseen by the Trial Steering Committee (TSC) and  
17 centrally coordinated by the Australasian Kidney Trials Network (AKTN) (Appendix). The  
18 safety of participants is overseen by an independent Data Safety Monitoring Board  
19 (Appendix). Participants, investigators, the AKTN coordinating centre staff and outcome  
20 assessors are all blinded to the treatment assignment in the IMPROVE-CKD study.  
21  
22  
23  
24  
25  
26  
27  
28  
29  
30  
31  
32  
33  
34  
35  
36  
37  
38  
39  
40  
41  
42  
43  
44  
45  
46  
47  
48  
49  
50  
51  
52  
53  
54  
55  
56  
57  
58  
59  
60

Table 4. Schedule of visits for the IMPROVE-CKD study

| Visits                                                    | Screening/<br>Randomisation | Baseline | Weeks post-baseline<br>(Study visit window is ±14 days of due date from baseline) |                    |                    |                     |                     |                     |                     |                 |
|-----------------------------------------------------------|-----------------------------|----------|-----------------------------------------------------------------------------------|--------------------|--------------------|---------------------|---------------------|---------------------|---------------------|-----------------|
|                                                           |                             |          | Week 12                                                                           | week 24            | week 36            | week 48             | week 60             | week 72             | week 84             | week 96         |
|                                                           |                             |          | Visit 1<br>Month 3                                                                | Visit 2<br>Month 6 | Visit 3<br>Month 9 | Visit 4<br>Month 12 | Visit 5<br>Month 15 | Visit 6<br>Month 18 | Visit 7<br>Month 21 | END<br>Month 24 |
| <b>Visit Assessments</b>                                  |                             |          |                                                                                   |                    |                    |                     |                     |                     |                     |                 |
| Informed Consent                                          | X                           |          |                                                                                   |                    |                    |                     |                     |                     |                     |                 |
| Participant randomised                                    | X                           |          |                                                                                   |                    |                    |                     |                     |                     |                     |                 |
| Electrocardiogram (ECG)                                   | X                           |          |                                                                                   |                    |                    |                     |                     |                     |                     |                 |
| Demographics and Medical History                          |                             | X        |                                                                                   |                    |                    |                     |                     |                     |                     |                 |
| Physical Examination                                      |                             | X        |                                                                                   | X                  |                    | X                   |                     | X                   |                     | X               |
| Concomitant Medications                                   |                             | X        | X                                                                                 | X                  | X                  | X                   | X                   | X                   | X                   | X               |
| CT scan – multi-slice, non-contrast *                     |                             | X        |                                                                                   |                    |                    |                     |                     |                     |                     | X               |
| Pulse Wave Velocity and Augmentation Index                | X                           |          |                                                                                   | X                  |                    | X                   |                     | X                   |                     | X               |
| Cardiac MRI * (for participating sites)                   |                             | X        |                                                                                   |                    |                    |                     |                     |                     |                     | X               |
| Medication dispensed                                      |                             | X        | X                                                                                 | X                  | X                  | X                   | X                   | X                   | X                   |                 |
| Medication returned                                       |                             |          | X                                                                                 | X                  | X                  | X                   | X                   | X                   | X                   | X               |
| Adverse Events recorded (SAEs and ADRs)                   |                             |          | X                                                                                 | X                  | X                  | X                   | X                   | X                   | X                   | X               |
| Dietitian assisted food record^ (for participating sites) |                             | X        |                                                                                   |                    |                    | X                   |                     |                     |                     | X               |

\* if participants withdraw from the study after 12 months and prior to 24 months they will be requested to do a 'close-out' CT and MRI scan. Some sites will also perform additional MRI scans to investigate diastolic dysfunction

^ for participants enrolled in the dietary component of the study

Abbreviations: CT, computed tomography; MRI, magnetic resonance imaging, ADRs, adverse drug reactions; SAEs, serious adverse events

Table 5. Laboratory outcome measures in the IMPROVE-CKD study

| Visits                                               | Screening/<br>Randomisation | Baseline | Weeks post-baseline<br>(Laboratory test window is $\pm 14$ days from visit date) |                               |                               |                                |                                |                                |                                |                            |
|------------------------------------------------------|-----------------------------|----------|----------------------------------------------------------------------------------|-------------------------------|-------------------------------|--------------------------------|--------------------------------|--------------------------------|--------------------------------|----------------------------|
|                                                      |                             |          | Week 12<br>Visit 1<br>Month 3                                                    | week 24<br>Visit 2<br>Month 6 | week 36<br>Visit 3<br>Month 9 | week 48<br>Visit 4<br>Month 12 | week 60<br>Visit 5<br>Month 15 | week 72<br>Visit 6<br>Month 18 | week 84<br>Visit 7<br>Month 21 | week 96<br>END<br>Month 24 |
| <b>Locally Tested Laboratory Assessments</b>         |                             |          |                                                                                  |                               |                               |                                |                                |                                |                                |                            |
| Full Blood Count                                     |                             | X        | X                                                                                | X                             | X                             | X                              | X                              | X                              | X                              | X                          |
| Biochemistry, Renal and Liver Function Tests         |                             | X        | X                                                                                | X                             | X                             | X                              | X                              | X                              | X                              | X                          |
| C-reactive Protein (CRP)                             |                             | X        | X                                                                                | X                             | X                             | X                              | X                              | X                              | X                              | X                          |
| Fasting Serum Lipid Profile                          |                             | X        |                                                                                  | X                             |                               | X                              |                                | X                              |                                | X                          |
| Fasting Glucose                                      |                             | X        |                                                                                  | X                             |                               | X                              |                                | X                              |                                | X                          |
| HbA1c *                                              |                             | X        |                                                                                  | X                             |                               | X                              |                                | X                              |                                | X                          |
| Intact Parathyroid Hormone (iPTH)                    |                             | X        |                                                                                  | X                             |                               | X                              |                                | X                              |                                | X                          |
| Other Liver Function Tests                           |                             | X        |                                                                                  |                               |                               | X                              |                                |                                |                                | X                          |
| Iron studies                                         |                             | X        |                                                                                  |                               |                               | X                              |                                |                                |                                | X                          |
| Vitamin D (25-D)                                     |                             | X        |                                                                                  |                               |                               | X                              |                                |                                |                                | X                          |
| Spot urine (ACR, PCR and Phosphate:creatinine ratio) |                             | X        |                                                                                  |                               |                               | X                              |                                |                                |                                | X                          |
| 24 Hour Urine collection – timed excretion           |                             | X        |                                                                                  |                               |                               | X                              |                                |                                |                                | X                          |
| <b>Centrally Tested Laboratory Assessments</b>       |                             |          |                                                                                  |                               |                               |                                |                                |                                |                                |                            |
| Fibroblast growth factor-23 (FGF-23)                 |                             | X        |                                                                                  | X                             |                               | X                              |                                | X                              |                                | X                          |
| Asymmetrical dimethyl arginine (ADMA)                |                             | X        |                                                                                  |                               |                               | X                              |                                |                                |                                | X                          |
| Calcification inhibitors (OPG, MGP, fetuin-A)        |                             | X        |                                                                                  | X                             |                               | X                              |                                | X                              |                                | X                          |
| Vitamin D binding protein                            |                             | X        |                                                                                  |                               |                               | X                              |                                |                                |                                | X                          |

\* Only performed in patients with diabetes

**Abbreviations:** ACR, albumin:creatinine ratio; PCR, protein:creatinine ratio; MGP, matrix Gla protein; OPG, osteoprotegerin



### ***Primary outcome***

The primary outcome of the IMPROVE-CKD study is change in large arterial compliance (as measured by carotid-femoral PWV) at 96 weeks after randomization to lanthanum carbonate or placebo. Hyperphosphatemia has been associated with reduced arterial compliance and multiple studies have reported a positive relationship between serum phosphate and PWV (8, 26). PWV has been used to measure arterial compliance and is considered to be a valid surrogate for cardiovascular morbidity and mortality (27, 28). PWV also correlates with CKD stage and increases as CKD progresses (29, 30). In the IMPROVE-CKD study, arterial compliance is being measured using a SphygmoCor device (AtCor, PWV Inc., Westmead, Sydney, Australia) with determination of carotid-femoral PWV. Carotid-femoral PWV measures the interval between pulse waves at the carotid and femoral arteries, with higher values representing stiffer vessels. Mean inter-observer and day-to-day reproducibilities of PWV measurements have been reported in studies of patients with CKD to be acceptable, with differences of 0.3 +/- 3.2 m/s and -0.7 +/- 1.9 m/s in some studies (31). Pulse wave analysis is also being measured using augmentation index (AI) by the SphygmoCor device as an additional outcome. AI represents the difference between early and late systolic peaks of the systolic pulse wave contour, divided by pulse pressure (%).

### ***Secondary Outcomes***

#### ***Vascular calcification***

Abdominal aortic calcification is being determined using computed tomography (CT) at baseline and 96 weeks in the IMPROVE-CKD study. If patients exit the study after 12 months, they will be invited to have an early exit CT scan. Aortic calcification is estimated to be present in approximately 60% of patients with CKD stages 4 and 5, and increases in those

1  
2  
3  
4 on dialysis, with progressive disease related to dialysis vintage (32). Aortic calcification is  
5 related to the presence of other vascular disease, as well as to serum phosphate and PTH  
6 levels. There is an association of aortic calcification and arterial compliance, with  
7 correlations between calcium scoring via CT and PWV (26).  
8  
9  
10  
11  
12

### 13 14 15 *Left ventricular hypertrophy*

16 PWV has been associated with increased left ventricular mass and the development of  
17 diastolic dysfunction in hypertensive patients (33). However, left ventricular mass has also  
18 been associated with the development of hyperphosphatemia independent of PWV (7). In the  
19 IMPROVE-CKD study, cardiac magnetic resonance imaging (MRI), the gold standard to  
20 evaluate the development of left ventricular hypertrophy, is being used to measure left  
21 ventricular mass on a sub-cohort of participants at baseline and 96 weeks. If a patient exits  
22 the study after 12 months, they will be invited to have an exit MRI.  
23  
24  
25  
26  
27  
28  
29  
30  
31  
32  
33

### 34 35 *Biochemical parameters*

36 Serum phosphate, calcium and PTH are being assessed throughout the 96-week study period  
37 and FGF-23 is being measured 6-monthly using intact and c-terminal FGF-23 assays.  
38 Changes in urinary phosphate excretion are also being evaluated using 24-hour urine  
39 collections. Standard biochemical measurements are being performed in hospital laboratories  
40 with appropriate regulatory accreditation to monitor for adverse reactions.  
41  
42  
43  
44  
45  
46  
47  
48  
49

### 50 51 *Dietary phosphate*

52  
53 A dietary sub-study is included within IMPROVE CKD, to analyse daily dietary phosphate  
54 intake using a questionnaire at entry, 52 and 96-week visits. Diet is the main source of  
55  
56  
57  
58  
59  
60

1  
2  
3  
4 exogenous phosphate, and dietary phosphate restriction is recommended in treatment  
5 algorithms prior to initiation of phosphate binder therapy (1).  
6  
7  
8  
9

### 10 11 *Bone mineral density* 12

13  
14 Bone mineral density (BMD) is also being determined from the aortic CT images at baseline  
15 and at 96 weeks (34). Due to the complexity of CKD-MBD and lack of evidence-based  
16 treatment to manage renal bone disease, BMD as determined by dual-energy x-ray  
17 absorptiometry (DXA) has not been utilized routinely to predict fracture risk or monitor  
18 therapy. Low BMD, as a marker of osteoporosis and renal osteodystrophy, however, is a  
19 considerable component of CKD-MBD and recent prospective trials have reported that low  
20 BMD of the femoral neck and total hip in pre-dialysis CKD patients is associated with  
21 increased fracture rates (35). Improvement in BMD has been reported with the use of  
22 phosphate binders in contrast to placebo (21) and therefore BMD is an important additional  
23 outcome for the IMPROVE-CKD study.  
24  
25  
26  
27  
28  
29  
30  
31  
32  
33  
34  
35  
36  
37

### 38 *Statistical Considerations* 39

#### 40 *Sample size* 41

42  
43 The study is designed to detect a clinically meaningful difference of 1 m/s in PWV between  
44 the study groups at 96 weeks. Assuming a within group standard deviation of 2.9 m/s, a  
45 sample size of 356 patients would detect a 1 m/s difference in PWV at the 5% significance  
46 level with 90% statistical power. To account for an estimated 10% study withdrawal rate and  
47 10% non-adherence rate, recruitment of 488 participants is anticipated to be required. No  
48 provision was made for drop-ins given there is no provision for lanthanum carbonate to be  
49 accessed in the pre-dialysis CKD population in Australia, New Zealand and Malaysia.  
50  
51  
52  
53  
54  
55  
56  
57  
58  
59  
60

### *Analysis*

Outcome data from all randomized participants will be analysed according to the intention-to-treat principle. The effect of lanthanum carbonate on PWV at 96 weeks will be estimated using analysis of covariance (ANCOVA) to adjust for baseline PWV values. Subgroup analyses will be performed according to CKD stage (3b vs 4), age groups (<60 years, ≥60 years), presence of diabetes mellitus, and levels of serum phosphate (quartiles) by examining treatment by subgroup interactions in linear regression models. Differences in other continuous variables between the lanthanum and placebo groups will be analysed by ANCOVA adjusting for baseline measurements. Differences in the percentage change in Agatston scores between the study arms are not expected to be normally distributed and will be analysed using the Wilcoxon rank sum test. Differences between treatment groups on other categorical variables will be analysed using chi-square tests.

### **Discussion**

A recent systematic review and meta-analysis which evaluated evidence for correlation between the effects of CKD-MBD medications, such as phosphate binders, on biochemical parameters as well as on patient-level end-points of cardiovascular disease and mortality in patients with CKD (28 studies, 6,999 participants), reported that effects on serum phosphate levels were weakly and imprecisely correlated with all-cause and cardiovascular death. The authors of this meta-analysis concluded that, as existing data did not exclude a mortality benefit with treatment, trials are needed to address patient-centred outcomes to evaluate drug effectiveness in CKD-MBD (36). Another recent network meta-analysis of 77 RCTs that

1  
2  
3  
4 assessed the effects of different phosphate binders on mortality, cardiovascular disease and  
5  
6 biochemical parameters (involving 12,562 CKD patients), reported no evidence that any class  
7  
8 of phosphate binder lowered mortality or cardiovascular events when compared to placebo  
9  
10 (37). The vast majority of studies however involved dialysis patients (62 trials, 11,009  
11  
12 patients) and most trials were generally of short duration (median 6 months) with high risks  
13  
14 of bias. Again, these studies highlight the need for further RCTs involving phosphate-  
15  
16 lowering in patients with CKD not on dialysis, with longer duration of intervention and  
17  
18 assessment of outcomes beyond changes in biochemical parameters of CKD-MBD.  
19  
20  
21  
22  
23

24 The IMPROVE-CKD study, an international, multi-centre RCT, plans to determine if  
25  
26 lanthanum carbonate compared to placebo will improve or attenuate arterial compliance and  
27  
28 reduce the progression of aortic calcification in patients with CKD. Reduced arterial  
29  
30 compliance and increased vascular calcification are significant issues for patients with CKD,  
31  
32 by contributing to their greater cardiovascular morbidity and mortality. At present, there are  
33  
34 no treatment options that are proven to improve arterial stiffness or reduce vascular  
35  
36 calcification for patients with CKD-MBD, and the cautious guidance of international clinical  
37  
38 guidelines reflects this lack of evidence. The IMPROVE-CKD study will provide evidence  
39  
40 for or against the value of the phosphate binder lanthanum carbonate to affect the rate of  
41  
42 change of aortic PWV and aortic calcification. Should this study not achieve a separation in  
43  
44 serum phosphate values between the two arms of the trial, any differences in outcomes may  
45  
46 reflect differences in FGF-23. FGF-23 levels at 96 weeks might be expected to differ between  
47  
48 study arms, because FGF-23 is reported to fall with lanthanum carbonate therapy; although  
49  
50 this relationship has not been demonstrated consistently (38, 39).  
51  
52  
53  
54  
55  
56  
57  
58  
59  
60

1  
2  
3  
4 There is a growing understanding of circadian rhythm and the variability in relation to serum  
5 phosphate levels, with recent appreciation for the contribution of the nicotinamide  
6 phosphoribosyltransferase (Nampt)/nicotinamide adenine dinucleotide (NAD) system to the  
7 regulation of sodium-phosphate cotransporters. Nampt is a regulator of the intracellular NAD  
8 pool and this pathway is involved in renal and intestinal expression of sodium-dependent  
9 phosphate transporters (40). One of the potential reasons for the commonly observed  
10 heterogeneity in response to phosphate binders may be due to inter-individual variability in  
11 transcellular phosphate movement (41). Circadian variation in serum phosphate may not be  
12 regulated by hormones but determined by the Nampt/NAD system, which affects cellular  
13 shifts and renal and intestinal phosphate transport; and the time of day serum phosphate is  
14 measured may be critical to determining treatment effect with interventions directed at  
15 regulating serum phosphate. Morning serum phosphate is now considered less helpful when  
16 assessing any change from interventions, with the best time to detect a difference in the  
17 afternoon. One crossover feeding study in patients with CKD reported the circadian pattern of  
18 serum phosphate with the lowest concentrations at 0800 hours and highest at 1600 (42).  
19 Therefore, the effect of lanthanum carbonate on serum phosphate levels may or may not  
20 indicate a treatment effect, however this contributes to the rationale for why the IMPROVE-  
21 CKD study is assessing outcome measures other than serum phosphate to assess efficacy, and  
22 these other measures will more accurately reflect the impact of modifying phosphate  
23 homeostasis.

### 49 ***Clinical implications of the study***

50  
51 If the use of lanthanum carbonate in the IMPROVE-CKD study has a beneficial effect on  
52 surrogates for cardiovascular disease, this will provide support for the current hypothesis that  
53 phosphate binders and control of hyperphosphatemia may mitigate adverse cardiovascular  
54  
55  
56  
57  
58  
59  
60

1  
2  
3  
4 outcomes in patients with CKD. Although a larger trial would be required to demonstrate a  
5  
6 benefit on mortality, the use of surrogate cardiovascular outcomes should provide clinicians  
7  
8 with improved evidence regarding treatment strategies. Importantly, this study using  
9  
10 lanthanum carbonate, a non-calcium-based phosphate binder, allows for a more accurate  
11  
12 assessment of the effect of phosphate binding strategies on vascular calcification, without the  
13  
14 complication of an exogenous calcium load. This may provide evidence for the role of non-  
15  
16 calcium-based binders in the pre-dialysis CKD population, and help inform CKD-MBD  
17  
18 guidelines that currently lack strong evidence for phosphate control in CKD stages 3-5. In  
19  
20 addition, the IMPROVE-CKD study will provide valuable information regarding the  
21  
22 relationship between phosphate, FGF-23, arterial compliance and calcification in patients  
23  
24 with CKD.  
25  
26  
27  
28  
29  
30  
31  
32  
33  
34  
35  
36  
37  
38  
39  
40  
41  
42  
43  
44  
45  
46  
47  
48  
49  
50  
51  
52  
53  
54  
55  
56  
57  
58  
59  
60

## Author Contributions

All authors (NDT, EP, NL, CMH, GJE, EMP, AV, SVB, GAB, NCB, KC, JDC, SC, RJF, SGH, LSH, DJ, MJJ, DWJ, PGK, KKL, AM, VP, KRP, CAP, DR, LR, ERS, RJW, and AYMW) were involved in design of the study protocol. NDT, EP, NL, CMH, GJE, EMP, AV and SVB drafted the manuscript, and all authors approved the final version of the manuscript.

## Funding/Support

The IMPROVE-CKD study was funded by grants from the National Health and Medical Research Council (NHMRC) of Australia Project Grant (APP1044302); NHMRC Enabling Grant (ID 631731); NHMRC Programme Grant (APP1092957); and Shire Pharmaceuticals Development Limited Clinical Trial Contribution. Study medication (lanthanum carbonate and matching placebo) was supplied by Shire Pharmaceuticals.

## Competing interests

NDT has received honoraria, travel support and research funding from Amgen, Shire and Sanofi. CH has received research funding from Amgen and Shire. SGH has received honoraria, travel support or research funding from Amgen and Sanofi. DJ has received consultancy fees from Sanofi, travel support from Amgen and is a current recipient of an Australian National Health and Medical Research Council Practitioner Fellowship. ERS has received research funding from Amgen and Sanofi and owns stock in Calciscon.



## References

1. Kidney Disease: Improving Global Outcomes (KDIGO) CKD-MBD Work Group. KDIGO clinical practice guideline for the diagnosis, evaluation, prevention, and treatment of Chronic Kidney Disease–Mineral and Bone Disorder (CKD-MBD). *Kidney Int Suppl.* 2009; 113: S1-130.
2. Fort J. Chronic Renal Failure: A Cardiovascular Risk Factor. *Kidney Int* 2005;68(99):S25-S29.
3. Hruska K, Mathew S, Lund R, Fang Y, Sugatani T. Cardiovascular risk factors in chronic kidney disease: does phosphate qualify? *Kidney Int* 2011;79:S9-S13.
4. Jamal SA, Vandermeer B, Raggi P, Mendelssohn DC, Chatterley T, Dorgan M, et al. Effect of calcium-based versus non-calcium-based phosphate binders on mortality in patients with chronic kidney disease: an updated systematic review and meta-analysis. *The Lancet* 2013;382(9900):1268-1277.
5. Patel L, Bernard LM, Elder GJ. Sevelamer versus calcium-based binders for treatment of hyperphosphatemia in CKD: A meta-analysis of randomized controlled trials. *Clin J Am Soc Nephrol.* 2016 Feb 5;11(2):232-44
6. Tonelli M, Sacks F, Pfeffer M, Gao Z, Curhan G. Cholesterol And Recurrent Events Trial Investigators. Relation between serum phosphate level and cardiovascular event rate in people with coronary disease. *Circulation* 2005;112:2627-2633.
7. Chue CD, Edwards NC, Moody WE, Steeds RP, Townend JN, Ferro CJ. Serum phosphate is associated with left ventricular mass in patients with chronic kidney disease: a cardiac magnetic resonance study. *Heart* 2012;98(3):219.

- 1  
2  
3  
4 8. Six I, Maizel J, Barreto FC, Rangrez AY, Dupont S, Slama M, et al. Effects of  
5 phosphate on vascular function under normal conditions and influence of the uraemic state.  
6 *Cardiovasc Res* 2012;96(1):130-139.  
7  
8  
9  
10 9. Jüppner H. Phosphate and FGF-23. *Kidney Int* 2011;79:S24-S27.  
11  
12 10. Ozkok A, Kekik C, Karahan GE, Sakaci T, Ozel A, Unsal A, et al. FGF-23 associated  
13 with the progression of coronary artery calcification in hemodialysis patients. *BMC Nephrol*  
14 2013;14:241-241.  
15  
16  
17  
18 11. Isakova T, Ix JH, Sprague SM, Raphael KL, Fried L, Gassman JJ, et al. Rationale and  
19 approaches to phosphate and fibroblast growth factor 23 reduction in CKD. *J Am Soc*  
20 *Nephrol* 2015;26(10):2328-2339.  
21  
22  
23  
24  
25 12. Kimura K, Saika Y, Otani H, Fujii R, Mune M, Yukawa S. Factors associated with  
26 calcification of the abdominal aorta in hemodialysis patients. *Kidney Int Suppl.*  
27 1999;71:S238-41.  
28  
29  
30  
31 13. Moe SM, Chen NX. Mechanisms of vascular calcification in chronic kidney disease. *J*  
32 *Am Soc Nephrol* 2008;19(2):213-216.  
33  
34  
35  
36 14. Nasrallah MM, El-Shehaby AR, Salem MM, Osman NA, El Sheikh E, Sharaf El Din  
37 UAA. Fibroblast growth factor-23 (FGF-23) is independently correlated to aortic  
38 calcification in haemodialysis patients. *Nephrol Dial Transplant* 2010;25(8):2679-2685.  
39  
40  
41  
42 15. Scialla JJ, Lau WL, Reilly MP, Isakova T, Yang HY, Crouthamel MH, et al.  
43 Fibroblast growth factor 23 is not associated with and does not induce arterial calcification.  
44 *Kidney Int* 2013;83(6):1159-68.  
45  
46  
47  
48 16. Habbous S, Przech S, Acedillo R, Sarma S, Garg AX, Martin J. The efficacy and  
49 safety of sevelamer and lanthanum versus calcium-containing and iron-based binders in  
50 treating hyperphosphatemia in patients with chronic kidney disease: a systematic review and  
51 meta-analysis. *Nephrol Dial Transplant* 2017;32(1):111-125.  
52  
53  
54  
55  
56  
57  
58  
59  
60

17. KDIGO-MUWG. KDIGO 2017 clinical practice guideline update for the diagnosis, evaluation, prevention, and treatment of Chronic Kidney Disease–Mineral and Bone Disorder (CKD-MBD). *Kidney Int Suppl.* 2017;7:1-59.
18. Lopes AA, Tong L, Thumma J, Li Y, Fuller DS, Morgenstern H, et al. Phosphate binder use and mortality among hemodialysis patients in the Dialysis Outcomes and Practice Patterns Study (DOPPS): Evaluation of possible confounding by nutritional status. *Am J Kidney Dis* 2012;60(1):90-101.
19. Isakova T, Gutiérrez OM, Chang Y, Shah A, Tamez H, Smith K, et al. Phosphorus binders and survival on hemodialysis. *J Am Soc Nephrol* 2009;20(2):388-396.
20. Fernández-Martín JL, Carrero JJ, Benedik M, Bos W-J, Covic A, Ferreira A, et al. COSMOS: the dialysis scenario of CKD–MBD in Europe. *Nephrol Dial Transplant* 2013;28(7):1922-1935.
21. Block GA, Wheeler DC, Persky MS, Kestenbaum B, Ketteler M, Spiegel DM, et al. Effects of phosphate binders in moderate CKD. *J Am Soc Nephrol* 2012;23(8):1407-1415.
22. Chue CD, Townend JN, Moody WE, Zehnder D, Wall NA, Harper L, et al. Cardiovascular effects of sevelamer in stage 3 CKD. *J Am Soc Nephrol* 2013;24(5):842-852.
23. Seifert ME, de las Fuentes L, Rothstein M, Dietzen DJ, Bierhals AJ, Cheng SC, et al. Effects of phosphate binder therapy on vascular stiffness in early-stage chronic kidney disease. *Am J Nephrol* 2013;38(2):158-167.
24. Harrison TS, Scott LJ. Lanthanum Carbonate. *Drugs* 2004;64(9):985-996.
25. Zhang C, Wen J, Li Z, Fan J. Efficacy and safety of lanthanum carbonate on chronic kidney disease–mineral and bone disorder in dialysis patients: a systematic review. *BMC Nephrol* 2013;14:226-226.

- 1  
2  
3  
4 26. Toussaint ND, Lau KK, Strauss BJ, Polkinghorne KR, Kerr PG. Associations between  
5 vascular calcification, arterial stiffness and bone mineral density in chronic kidney disease.  
6  
7 *Nephrol Dial Transplant* 2008;23(2):586-593.  
8  
9
- 10 27. Pannier B, Guérin AP, Marchais SJ, Safar ME, London GM. Stiffness of capacitive  
11 and conduit arteries. *Hypertension* 2005;45(4):592.  
12  
13
- 14 28. Blacher J, Guerin AP, Pannier B, Marchais SJ, Safar ME, London GM. Impact of  
15 aortic stiffness on survival in end-stage renal disease. *Circulation* 1999;99(18):2434.  
16  
17
- 18 29. Tholen S, Klofat K, Pan Cheng R, Schmaderer C, Lutz J, Heemann U, et al.  
19 Progression of aortic pulse wave velocity in patients with chronic kidney disease. *J Clin*  
20  
21 *Hypertens* 2013;15(11):833-838.  
22  
23
- 24 30. Townsend RR, Anderson AH, Chirinos JA, Feldman HI, Grunwald JE, Nessel L, et  
25 al. Association of pulse wave velocity with chronic kidney disease progression and mortality:  
26 Findings from the CRIC Study (Chronic Renal Insufficiency Cohort). *Hypertension*  
27  
28 2018;71(6):1101-1107.  
29  
30
- 31 31. Frimodt-Møller M, Nielsen AH, Kamper A-L, Strandgaard S. Reproducibility of  
32 pulse-wave analysis and pulse-wave velocity determination in chronic kidney disease.  
33  
34 *Nephrol Dial Transplant* 2008;23(2):594-600.  
35  
36
- 37 32. Raggi P, Boulay A, Chasan-Taber S, Amin N, Dillon M, Burke SK, et al. Cardiac  
38 calcification in adult hemodialysis patients: A link between end-stage renal disease and  
39 cardiovascular disease? *J Am Coll Cardiol* 2002;39(4):695-701.  
40  
41
- 42 33. Brandts A, van Elderen SGC, Westenberg JJM, van der Grond J, van Buchem MA,  
43 Huisman MV, et al. Association of aortic arch pulse wave velocity with left ventricular mass  
44 and lacunar brain infarcts in hypertensive patients: assessment with MR imaging. *Radiology*  
45  
46 2009;253(3):681-688.  
47  
48  
49  
50  
51  
52  
53  
54  
55  
56  
57  
58  
59  
60

- 1  
2  
3  
4 34. Lee SJ, Binkley N, Lubner MG, Bruce RJ, Ziemlewicz TJ, Pickhardt PJ.  
5  
6 Opportunistic screening for osteoporosis using the sagittal reconstruction from routine  
7  
8 abdominal CT for combined assessment of vertebral fractures and density. *Osteoporos Int*.  
9  
10 2016;27(3):1131-1136.  
11  
12 35. Yencheek RH, Ix JH, Shlipak MG, Bauer DC, Rianon NJ, Kritchevsky SB, et al. Bone  
13  
14 mineral density and fracture risk in older individuals with CKD. *Clin J Amn Soc Nephrol*  
15  
16 2012;7(7):1130-1136.  
17  
18 36. Palmer SC, Teixeira-Pinto A, Saglimbene V, Craig JC, Macaskill P, Tonelli M, et al.  
19  
20 Association of drug effects on serum parathyroid hormone, phosphorus, and calcium levels  
21  
22 with mortality in CKD: A meta-analysis. *Am J Kidney Dis* 2015;66(6):962-971.  
23  
24 37. Palmer SC, Gardner S, Tonelli M, Mavridis D, Johnson DW, Craig JC, et al.  
25  
26 Phosphate-binding agents in adults with CKD: A network meta-analysis of randomized trials.  
27  
28 *Am J Kidney Dis* 2016;68(5):691-702.  
29  
30 38. Gonzalez-Parra E, Gonzalez-Casaus ML, Galán A, Martinez-Calero A, Navas V,  
31  
32 Rodriguez M, et al. Lanthanum carbonate reduces FGF23 in chronic kidney disease Stage 3  
33  
34 patients. *Nephrol Dial Transplant* 2011;26(8):2567-2571.  
35  
36 39. Isakova T, Barchi-Chung A, Enfield G, Smith K, Vargas G, Houston J, et al. Effects  
37  
38 of dietary phosphate restriction and phosphate binders on FGF23 levels in CKD. *Clin J Am*  
39  
40 *Soc Nephrol* 2013;8(6):1009-1018.  
41  
42 40. Miyagawa A, Tatsumi S, Takahama W, et al. The sodium phosphate cotransporter  
43  
44 family and nicotinamide phosphoribosyltransferase contribute to the daily oscillation of  
45  
46 plasma inorganic phosphate concentration. *Kidney Int* 2018;93:1073–1085.  
47  
48 41. Isakova T, Block G. The phosphate bucket list. *Kidney Int* 2018; 93(5):1033-1035.  
49  
50  
51  
52  
53  
54  
55  
56  
57  
58  
59  
60

- 1  
2  
3  
4 42. Ix JH, Anderson CA, Smits G, Persky MS, Block GA. Effect of dietary phosphate  
5 intake on the circadian rhythm of serum phosphate concentrations in chronic kidney disease:  
6 a crossover study. *Am J Clin Nutr* 2014;100(5):1392-1397.  
7  
8  
9  
10 43. McIntyre NJ, Fluck RJ, McIntyre CW, Fakis A, Taal MW. Determinants of arterial  
11 stiffness in chronic kidney disease stage 3. *PLoS One*. 2013;8(1):e55444.  
12  
13  
14 44. Dart AM, Gatzka CD, Cameron JD, Kingwell BA, Liang YL, Berry KL, Reid CM,  
15 Jennings GL. Large artery stiffness is not related to plasma cholesterol in older subjects with  
16 hypertension. *Arterioscler Thromb Vasc Biol* 2001;24:962-968.  
17  
18  
19 45. Mitchell GF, Hwang SJ, Vasan RS, Larson MG, Pencina MJ, Hamburg NM, Vita JA,  
20 Levy D, Benjamin EJ. Arterial stiffness and cardiovascular events: the Framingham heart  
21 study. *Circulation* 2010;121:505-511.  
22  
23  
24 46. Dart AM, Cameron JD, Gatzka CD, Willson K, Liang YL, Berry KL, et al. Similar  
25 effects of treatment on central and brachial blood pressures in polder hypertensive subjects in  
26 the second Australian national blood pressure trial. *Hypertension* 2007;49:1242-1247.  
27  
28  
29  
30  
31  
32  
33  
34  
35  
36  
37  
38  
39  
40  
41  
42  
43  
44  
45  
46  
47  
48  
49  
50  
51  
52  
53  
54  
55  
56  
57  
58  
59  
60

1  
2  
3  
4  
5  
6  
7  
8  
9  
10  
11  
12  
13  
14  
15  
16  
17  
18  
19  
20  
21  
22  
23  
24  
25  
26  
27  
28  
29  
30  
31  
32  
33  
34  
35  
36  
37  
38  
39  
40  
41  
42  
43  
44  
45  
46  
47  
48  
49  
50  
51  
52  
53  
54  
55  
56  
57  
58  
59  
60

**Figures**

Figure 1. Schema of the IMPROVE-CKD trial

For peer review only

1  
2  
3  
4  
5  
6  
7  
8  
9  
10  
11  
12  
13  
14  
15  
16  
17  
18  
19  
20  
21  
22  
23  
24  
25  
26  
27  
28  
29  
30  
31  
32  
33  
34  
35  
36  
37  
38  
39  
40  
41  
42  
43  
44  
45  
46  
47  
48  
49  
50  
51  
52  
53  
54  
55  
56  
57  
58  
59  
60

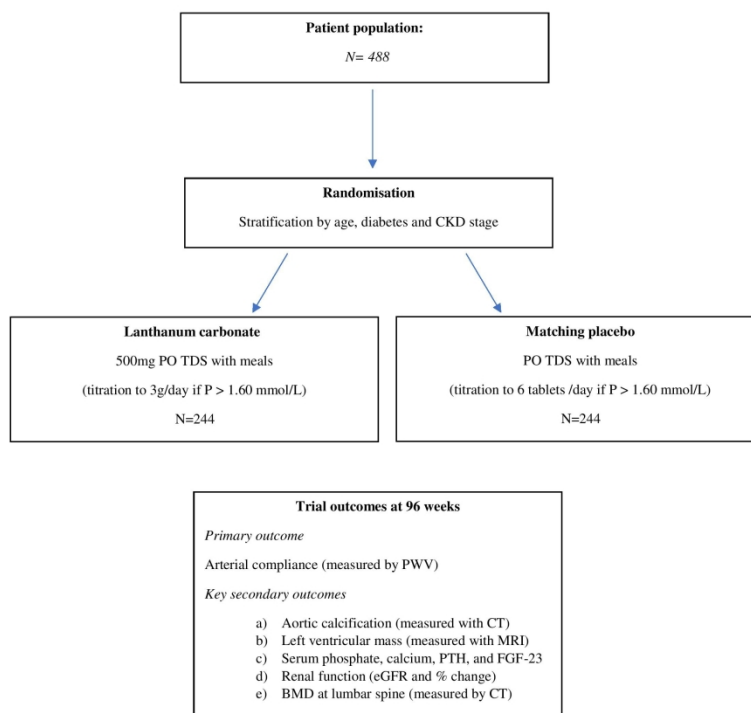

210x297mm (300 x 300 DPI)



## APPENDIX

### **Trial Steering Committee**

Nigel D Toussaint (Chair), Department of Nephrology, The Royal Melbourne Hospital, Parkville, Australia; Eugenia Pedagogos, Epworth Healthcare, Melbourne, Australia; Carmel M Hawley, Princess Alexandra Hospital, Brisbane, Australia; Grahame J Elder, Westmead Hospital, Westmead, Australia; Elaine M Pascoe, Australasian Kidney Trials Network, Brisbane, Australia; Sunil V Badve, St. George Hospital, Sydney, Australia; Geoffrey A Block, Colorado Kidney Care, Denver, United States; Neil C Boudville, Sir Charles Gairdner Hospital, Perth, Australia; Katrina Campbell, Princess Alexandra Hospital, Brisbane, Australia; James D Cameron, Monash Heart, Monash University, Clayton, Australia; Sylvia Chen, Epworth Healthcare, Melbourne, Australia; Randall J Faull, Royal Adelaide Hospital, Adelaide, Australia; Stephen G Holt, The Royal Melbourne Hospital, Parkville, Australia; Lai S Hooi, Sultanah Aminah Hospital, Johor Bahru, Malaysia; Meg J Jardine, The George Institute for Global Health, Sydney, Australia; Peter G Kerr, Monash Medical Centre, Clayton, Australia; Kenneth K Lau, Monash Medical Centre, Clayton, Australia; Vlado Perkovic, The George Institute for Global Health, Sydney, Australia; Kevan R Polkinghorne, Monash Medical Centre, Clayton, Australia; Carol A Pollock, Royal North Shore Hospital, Sydney, Australia; Donna Reidlinger, Australasian Kidney Trials Network, Brisbane, Australia; Edward R Smith, The Royal Melbourne Hospital, Parkville, Australia; Robert J Walker, Dunedin Hospital, Dunedin, New Zealand; Angela Yee Moon Wang, Queen Mary Hospital, University of Hong Kong, Hong Kong.

### **Data Safety Monitoring Board**

Bruce C Neal (Chair), Deputy Executive Director, The George Institute for Global Health, and Professor of Medicine, University of New South Wales, Sydney, Australia; Andrew B Forbes, Department of Epidemiology and Preventive Medicine, Monash University, Clayton, Australia; Christoph Wanner, Division of Nephrology and Hypertension, University Hospital of Würzburg, Germany; and David C Wheeler, Centre for Nephrology, Royal Free and University College Medical School, London, the United Kingdom.

## **Australasian Kidney Trials Network**

Australasian Kidney Trials Network (AKTN), Brisbane, Queensland, Australia

### ***Operational Team***

Carmel M Hawley (Chair, AKTN Operations Secretariat), David W Johnson (Deputy Chair, AKTN Operations Secretariat), Sunil V Badve, Yeong Jee Cho, Darsy Darssan, Magid Fahim, Rathika Krishnasamy, Alicia Morrish, Elaine M Pascoe, Peta-Anne Paul-Brent, Donna Reidlinger, Laura Robison, Anish Scaria, Andrea Valks, Liza Vergara.

### ***Executive Committee***

Carmel M Hawley (Chair), David W Johnson (Deputy Chair), Sunil V Badve, Neil C Boudville, Alan Cass, Meg J Jardine, Alicia Morrish, Elaine M Pascoe, Vlado Perkovic, Donna Reidlinger.

# BMJ Open

## Can we IMPROVE cardiovascular outcomes through phosphate lowering in CKD? - Rationale and protocol for the Impact of Phosphate Reduction On Vascular End-points in Chronic Kidney Disease (IMPROVE-CKD) study

|                                 |                                                                                                                                                                                                                                                                                                                                                                                                                                                                                                                                                                                                                              |
|---------------------------------|------------------------------------------------------------------------------------------------------------------------------------------------------------------------------------------------------------------------------------------------------------------------------------------------------------------------------------------------------------------------------------------------------------------------------------------------------------------------------------------------------------------------------------------------------------------------------------------------------------------------------|
| Journal:                        | <i>BMJ Open</i>                                                                                                                                                                                                                                                                                                                                                                                                                                                                                                                                                                                                              |
| Manuscript ID                   | bmjopen-2018-024382.R1                                                                                                                                                                                                                                                                                                                                                                                                                                                                                                                                                                                                       |
| Article Type:                   | Protocol                                                                                                                                                                                                                                                                                                                                                                                                                                                                                                                                                                                                                     |
| Date Submitted by the Author:   | 09-Oct-2018                                                                                                                                                                                                                                                                                                                                                                                                                                                                                                                                                                                                                  |
| Complete List of Authors:       | Lioufas, Nicole; Royal Melbourne Hosp, Nephrology; University of Melbourne, Department of Medicine<br>Toussaint, Nigel D.; Royal Melbourne Hosp, Nephrology; University of Melbourne, Department of Medicine<br>Pedagogos, Eugenia; Epworth Healthcare<br>Elder, Grahame; Westmead Hospital, Department of Renal Medicine<br>Badve, Sunil; St. George Hospital, Department of Nephrology<br>Pascoe, Elaine; University of Queensland, Faculty of Medicine; Australasian Kidney Trials Network<br>Valks, Andrea; Australasian Kidney Trials Network, University of Queensland<br>Hawley, Carmel; The University of Queensland |
| <b>Primary Subject Heading</b>: | Renal medicine                                                                                                                                                                                                                                                                                                                                                                                                                                                                                                                                                                                                               |
| Secondary Subject Heading:      | Research methods                                                                                                                                                                                                                                                                                                                                                                                                                                                                                                                                                                                                             |
| Keywords:                       | phosphate, mineral metabolism, randomized controlled trial, CKD-MBD, pulse wave velocity, vascular calcification                                                                                                                                                                                                                                                                                                                                                                                                                                                                                                             |
|                                 |                                                                                                                                                                                                                                                                                                                                                                                                                                                                                                                                                                                                                              |

SCHOLARONE™  
Manuscripts

## **Title page**

# **Can we IMPROVE cardiovascular outcomes through phosphate lowering in CKD? – Rationale and protocol for the IMPact of Phosphate Reduction On Vascular End-points in Chronic Kidney Disease (IMPROVE-CKD) study**

Nicole LIOUFAS\*<sup>1,2</sup>, Nigel D TOUSSAINT\*<sup>1,2</sup>, Eugenia PEDAGOGOS<sup>2,3</sup>, Grahame J ELDER<sup>4,5</sup>, Sunil V BADVE<sup>6</sup>, Elaine M PASCOE<sup>7,8</sup>, Andrea VALKS<sup>7,8</sup>, Carmel M HAWLEY<sup>7,8,9</sup>, on behalf of the **IMPROVE-CKD** Writing Committee.

<sup>1</sup>*Department of Nephrology, The Royal Melbourne Hospital, Parkville, Australia,*

<sup>2</sup>*Department of Medicine (RMH), University of Melbourne, Parkville, Australia,* <sup>3</sup>*Epworth*

*HealthCare, Melbourne, Australia,* <sup>4</sup>*Department of Renal Medicine, Westmead Hospital,*

*Westmead, Australia,* <sup>5</sup>*Osteoporosis and Bone Biology Division, Garvan Institute of Medical*

*Research, Darlinghurst, Australia,* <sup>6</sup>*Department of Nephrology, St. George Hospital, Sydney,*

*Australia,* <sup>7</sup>*Faculty of Medicine, University of Queensland, Woolloongabba, Australia,*

<sup>8</sup>*Australasian Kidney Trials Network, Brisbane, Australia,* <sup>9</sup>*Department of Nephrology,*

*Princess Alexandra Hospital, Woolloongabba, Australia.*

\* Co-primary authors

**Running head:** IMPROVE-CKD study

**Protocol version:** Version 3.0

**Word count:** *Abstract* 287      *Text* 4184

**Correspondence:** Associate Professor Nigel Toussaint  
Department of Nephrology, The Royal Melbourne Hospital,  
Grattan Street, Parkville, Victoria 3052, Australia.  
E-mail: [Nigel.Toussaint@mh.org.au](mailto:Nigel.Toussaint@mh.org.au)

**Keywords:** arterial compliance, cardiovascular disease, chronic kidney disease, chronic kidney disease mineral and bone disorder (CKD-MBD), phosphate, vascular calcification

***Full list of members for IMPROVE-CKD Writing Committee:***

Nigel D Toussaint, The Royal Melbourne Hospital, Parkville, Victoria, Australia; and  
The University of Melbourne, Parkville, Victoria, Australia.

Eugenia Pedagogos, Epworth Healthcare, Melbourne, Victoria, Australia.

Nicole Lioufas, The Royal Melbourne Hospital, Parkville, Victoria, Australia.

Carmel M Hawley, Princess Alexandra Hospital, Brisbane, Queensland, Australia.

Grahame J Elder, Westmead Hospital, Westmead, New South Wales, Australia.

Elaine M Pascoe, Australasian Kidney Trials Network, Brisbane, Australia.

Andrea Valks, Australasian Kidney Trials Network, Brisbane, Australia.

Sunil V Badve, St. George Hospital, Sydney, New South Wales, Australia.

Geoffrey A Block, Colorado Kidney Care, Denver, United States.

Neil C Boudville, Sir Charles Gairdner Hospital, Perth, Western Australia, Australia; and  
University of Western Australia, Perth, Western Australia, Australia.

Katrina Campbell, Princess Alexandra Hospital, Brisbane, Queensland, Australia.

James D Cameron, Monash Medical Centre, Clayton, Victoria, Australia.

Sylvia SM Chen, Epworth Healthcare, Melbourne, Victoria, Australia.

Randall J Faull, Royal Adelaide Hospital, Adelaide, South Australia, Australia.

Stephen G Holt, The Royal Melbourne Hospital, Parkville, Victoria, Australia.

Lai S Hooi, Sultanah Aminah Hospital, Johor Bahru, Malaysia.

Dana Jackson, Monash Medical Centre, Clayton, Victoria, Australia.

Meg J Jardine, Concord Hospital, Sydney, New South Wales, Australia.

David W Johnson, Princess Alexandra Hospital, Brisbane, Queensland, Australia; and  
University of Queensland, Brisbane, Queensland, Australia.

Peter G Kerr, Monash Medical Centre, Clayton, Victoria, Australia.

Kenneth K Lau, Monash Medical Centre, Clayton, Victoria, Australia.

Alicia Morrish, Australasian Kidney Trials Network, Brisbane, Australia.

Vlado Perkovic, The George Institute, Sydney, New South Wales, Australia.

Kevan R Polkinghorne, Monash Medical Centre, Clayton, Victoria, Australia.

Carol A Pollock, Royal North Shore Hospital, Sydney, New South Wales, Australia.

Donna Reidlinger, Australasian Kidney Trials Network, Brisbane, Australia.

Laura Robison, Australasian Kidney Trials Network, Brisbane, Australia.

Edward R Smith, The Royal Melbourne Hospital, Parkville, Victoria, Australia.

Robert J Walker, Dunedin Hospital, Dunedin, New Zealand.

Angela Yee Moon Wang, University of Hong Kong, Queen Mary Hospital, Hong Kong.

## Abstract

**Introduction:** Patients with chronic kidney disease (CKD) are at heightened cardiovascular risk, which has been associated with abnormalities of bone and mineral metabolism. A deeper understanding of these abnormalities should facilitate improved treatment strategies and patient-level outcomes, but at present there are few large, randomized controlled clinical trials to guide management. Positive associations between serum phosphate and fibroblast growth factor 23 (FGF-23) and cardiovascular morbidity and mortality in both the general and CKD populations have resulted in clinical guidelines suggesting that serum phosphate be targeted towards the normal range, although few randomized and placebo-controlled studies have addressed clinical outcomes using interventions to improve phosphate control. Early preventive measures to reduce the development and progression of vascular calcification, left ventricular hypertrophy, and arterial stiffness are crucial in patients with CKD.

**Methods and Analysis:** We outline the rationale and protocol for an international, multi-centre, randomized parallel-group trial assessing the impact of the non-calcium-based phosphate binder, lanthanum carbonate, compared to placebo on surrogate markers of cardiovascular disease in a pre-dialysis CKD population – the IMPROVE-CKD study. The primary objective of the IMPROVE-CKD study is to determine if use of lanthanum carbonate reduces the burden of cardiovascular disease in patients with CKD stages 3b and 4 when compared to placebo. The primary end-point of the study is change in arterial compliance measured by pulse wave velocity over a 96-week period. Secondary outcomes include change in aortic calcification and biochemical parameters of serum phosphate, parathyroid hormone and FGF-23 levels.

1  
2  
3  
4 **Ethics and Dissemination:** Ethical approval for the IMPROVE-CKD trial was obtained by  
5  
6 each local Institutional Ethics Committee for all 17 participating sites in Australia, New  
7  
8 Zealand and Malaysia prior to study commencement. Results of this clinical trial will be  
9  
10 published in peer-reviewed journals and presented at conferences.  
11  
12  
13

14 **IMPROVE-CKD registration number** ACTRN12610000650099  
15  
16  
17  
18  
19  
20  
21

### 22 **Strengths and limitations of this study**

23  
24

- 25 ● Largest cohort and longest in duration for randomized, placebo-controlled trial of  
26 phosphate binders in non-dialysis chronic kidney disease (CKD) population.  
27  
28
- 29 ● Assesses potential effects, yet to be determined, of phosphate-lowering on arterial  
30 compliance and vascular calcification in patients with CKD.  
31  
32
- 33 ● Avoids exogenous calcium load by using non-calcium-based phosphate binders in  
34 blinded fashion to inform clinical guidelines lacking strong evidence for phosphate  
35 control.  
36  
37
- 38 ● Will provide valuable information regarding relationship between phosphate, FGF-  
39 23, and arterial compliance and calcification in CKD.  
40  
41
- 42 ● Limitations include potential difficulty in recruitment of large CKD population to  
43 assess thrice-daily phosphate binders, and possible lack of adherence to study  
44 medication over 96-week period.  
45  
46  
47  
48  
49  
50  
51  
52  
53  
54  
55  
56  
57  
58  
59  
60

1  
2  
3  
4  
5  
6  
7 ‘Chronic Kidney Disease - Mineral Bone Disorder’ (CKD-MBD) has been accepted  
8 terminology in nephrology research and clinical practice for more than a decade. This clinical  
9 entity encompasses intimately related abnormalities of mineral homeostasis, bone turnover  
10 and mineralization, and vascular and soft tissue calcification, which are almost universal in  
11 patients with advanced chronic kidney disease (CKD). CKD-MBD is a complex and evolving  
12 area for which international clinical guidelines have been published to provide suggestions  
13 and recommendations on management (1). Just as importantly, these guidelines highlight the  
14 paucity of clinical studies supporting suggested biochemical targets, and the lack of evidence-  
15 based treatment strategies aimed at reducing the risks of fracture, cardiovascular disease and  
16 mortality or improving quality of life for individuals with CKD.  
17  
18  
19  
20  
21  
22  
23  
24  
25  
26  
27  
28  
29  
30

31 Patients with CKD have significantly increased risks of cardiovascular disease and all-cause  
32 mortality compared to the general population (2), and traditional and CKD-specific risk  
33 factors contribute to this risk (3). Abnormalities of bone and mineral metabolism, and in  
34 particular abnormal values of serum phosphate, calcium, parathyroid hormone (PTH) and  
35 fibroblast growth factor 23 (FGF-23), are considered important, however few strong  
36 recommendations for treatment of these values exist beyond normalising serum phosphate  
37 and lowering PTH to an indeterminate target (1). Minimizing exogenous calcium through  
38 reducing exposure to calcium-based phosphate binders within the CKD population has also  
39 been suggested as beneficial, citing meta-analyses showing mortality benefits of non-calcium  
40 containing phosphate binders over calcium-based binders (4, 5), but placebo-controlled  
41 studies are lacking.  
42  
43  
44  
45  
46  
47  
48  
49  
50  
51  
52  
53  
54  
55  
56  
57  
58  
59  
60





1  
2  
3  
4 with CKD have shown a reduction of dietary phosphate absorption, serum phosphate and  
5 FGF-23 levels (11). However, evidence for the benefit of such strategies on surrogates for  
6 cardiovascular disease or for CKD progression remains elusive.  
7  
8  
9

10  
11  
12  
13 Abnormal mineral metabolism, with alterations in the regulation of calcium, phosphate and  
14 FGF-23, is also associated with the development of vascular calcification (12). Although  
15 mechanisms leading to vascular calcification are incompletely understood, hypotheses  
16 include a maladaptive repair response to vascular and endothelial damage (13), and  
17 enhancement of concentration-dependent calcium-phosphate precipitation and extracellular  
18 matrix deposition due to elevated phosphate levels. Studies also report coronary artery  
19 calcification associated with elevated FGF-23 values independent of serum phosphate (10,  
20 14), although this association is not a consistent finding (15). In addition to abnormalities of  
21 mineral metabolism, exogenous calcium has been associated with the development and  
22 progression of vascular calcification in patients with CKD. A meta-analysis of phosphate  
23 binders by Jamal *et al*, analysing 14 RCTs, reported a reduction in mortality associated with  
24 the use of non-calcium containing phosphate binders (4). A more recent meta-analysis of 25  
25 eligible studies showed a reduction in all-cause mortality with sevelamer versus calcium-  
26 based binders (5). This difference is potentially related to a positive calcium balance in  
27 patients prescribed calcium-based phosphate binders leading to increasing vascular  
28 calcification. Another meta-analysis reviewed the individual contribution of available non-  
29 calcium-based phosphate binders, and reported that current data are more robust for  
30 sevelamer than for lanthanum or iron-based binders (16).  
31  
32  
33  
34  
35  
36  
37  
38  
39  
40  
41  
42  
43  
44  
45  
46  
47  
48  
49  
50  
51  
52  
53  
54  
55  
56  
57  
58  
59  
60

1  
2  
3  
4 The recently updated Kidney Disease Improving Global Outcomes (KDIGO) CKD-MBD  
5  
6 Guidelines (17) highlighted the lack of trial data demonstrating that lowering serum  
7  
8 phosphate improved patient-centred outcomes. In fact, the evidence for any phosphate-  
9  
10 lowering intervention is only based on epidemiological studies and biological plausibility.  
11  
12 Although several recent historical cohort analyses (DOPPS, ArMORR and COSMOS)  
13  
14 suggested that the prescription of phosphate binders to dialysis patients improved survival  
15  
16 (18-20), these reports were not included in the evidence review for the updated KDIGO  
17  
18 Guidelines. However, a recent RCT comparing calcium and non-calcium-based phosphate  
19  
20 binders with placebo in 148 patients with CKD stages 3-4 (21) was included in the guideline  
21  
22 update review and reported a minimal reduction of serum phosphate in the active treatment  
23  
24 groups, no overall effect on FGF-23 and increases in coronary artery calcification for the  
25  
26 combined phosphate binder groups (predominantly associated with the calcium-based binder  
27  
28 arm).  
29  
30  
31  
32  
33  
34

35 Similarly, two placebo-controlled RCTs of phosphate-lowering in pre-dialysis CKD have  
36  
37 also failed to support the benefit of phosphate-lowering in this population (Table 1). Chue *et*  
38  
39 *al.* found no significant differences between sevelamer and placebo with regard to left  
40  
41 ventricular mass, systolic and diastolic function, or pulse wave velocity (PWV) in 109  
42  
43 patients with CKD after 40 weeks, although only 56% of subjects took  $\geq 80\%$  of the  
44  
45 prescribed therapy (22). In the adherent subgroup, treatment with sevelamer was associated  
46  
47 with lower urinary excretion of phosphate and serum FGF-23, although binder use was not  
48  
49 associated with cardiovascular outcomes of interest such as left ventricular hypertrophy or  
50  
51 arterial compliance. In a smaller study of 38 CKD patients, Seifert *et al.* reported no  
52  
53 differences between lanthanum or placebo over 12 months with respect to serum or urinary  
54  
55  
56  
57  
58  
59  
60

1  
2  
3  
4 phosphate, or surrogate cardiovascular markers of PWV, carotid artery intima-media  
5  
6 thickness or vascular calcification (23). These results question the efficacy and safety of  
7  
8 phosphate binders in this population and the updated KDIGO guidelines have amended a  
9  
10 previous recommendation statement to maintain serum phosphate in the normal range for  
11  
12 patients with CKD stages 3-5 to now suggest that treatment should focus on patients with  
13  
14 overt hyperphosphatemia, although this recommendation is still based on weak clinical  
15  
16 evidence.  
17  
18  
19  
20  
21

22  
23 Currently there are two relevant RCTs in progress (Table 1). The COMBINE (CKD Optimal  
24  
25 Management With BInders and Nicotinamide) study assesses the effects of lowering serum  
26  
27 phosphate and FGF-23 levels in patients with CKD stages 3-4 (11). This study aims to recruit  
28  
29 200 participants and evaluate the use of nicotinamide and lanthanum carbonate in a double-  
30  
31 blind, placebo-controlled trial over 12 months. The primary aim of COMBINE is the safety  
32  
33 and biochemical efficacy of these phosphate-lowering agents, although assessments of  
34  
35 circulating biomarkers of bone and mineral metabolism and magnetic resonance imaging  
36  
37 (MRI) of intermediate measures of cardiovascular disease will also be measured. Enrolment  
38  
39 for this RCT began in 2015 with results expected in 2018. We have also commenced a large  
40  
41 multi-centre RCT, the IMPROVE-CKD study, to investigate the role of phosphate binders in  
42  
43 early stages of CKD. This trial, conducted over a longer period and with a larger cohort, aims  
44  
45 to assess potential effects of phosphate lowering on arterial compliance, vascular calcification  
46  
47 and left ventricular mass.  
48  
49  
50  
51  
52  
53  
54  
55  
56  
57  
58  
59  
60

**Table 1.** Placebo-controlled RCTs of phosphate lowering in patients with CKD stage 3-5 not on dialysis assessing surrogate parameters of cardiovascular disease

| Study                                 | Population                                           | Intervention                                                     | Finding                                                                                                                     |
|---------------------------------------|------------------------------------------------------|------------------------------------------------------------------|-----------------------------------------------------------------------------------------------------------------------------|
| Block <i>et al</i><br>(PNT)(21)       | 148 patients<br>CKD3-4                               | Lanthanum carbonate,<br>sevelamer carbonate,<br>calcium acetate  | Reduced urinary phosphate and serum phosphate;<br>Promotion of vascular calcification with binders;<br>No difference in PWV |
| Chue <i>et al</i><br>(CRIB-PHOS)(22)  | 120 patients<br>CKD3 non-diabetic                    | Sevelamer carbonate vs placebo                                   | Lower urinary phosphate and FGF-23 (later in compliant patients)                                                            |
| Seifert <i>et al</i> (23)             | 38 patients<br>CKD3                                  | Lanthanum vs placebo                                             | No differences in serum/urine phosphate, PWV, carotid IMT, vascular calcification                                           |
| Isakova <i>et al</i><br>(COMBINE)(11) | Aimed recruitment of<br>200 patients<br>CKD3-4       | Lanthanum vs lanthanum + nicotinamide vs nicotinamide vs placebo | Ongoing                                                                                                                     |
| IMPROVE-CKD                           | Aimed recruitment of<br>488 patients<br>with CKD3b-4 | Lanthanum vs placebo                                             | Ongoing                                                                                                                     |

1  
2  
3  
4  
5  
6 Abbreviations: IMT, intimal medial thickness; PWV, pulse wave velocity; PNT, Phosphate  
7 Normalisation Trial; CRIB-PHOS, Chronic Renal Impairment in Birmingham – Phosphate study;  
8 COMBINE, CKD Optimal Management With Binders and NicotinamidE study; IMPROVE-CKD,  
9 Impact of Phosphate Reduction On Vascular End-Points in CKD  
10  
11  
12  
13  
14  
15  
16  
17  
18

## 19 **Overview of the IMPROVE-CKD Study**

### 21 *Study aims*

22  
23  
24 The primary objective of the IMPROVE-CKD study is to determine if use of the non-  
25 calcium-based phosphate binder lanthanum carbonate reduces the burden of cardiovascular  
26 disease in patients with CKD stages 3b and 4 when compared to placebo. The primary end-  
27 point of the study is change in arterial compliance measured by PWV over a 96-week period.  
28  
29 Secondary outcomes include change in aortic calcification and biochemical parameters of  
30 serum phosphate, PTH and FGF-23 levels.  
31  
32  
33  
34  
35  
36  
37  
38  
39  
40

### 41 *Study design, setting and participants*

42  
43 The IMPROVE-CKD study is an investigator-led, prospective, double-blind, randomized  
44 placebo-controlled parallel-group trial. Figure 1 demonstrates the overall study design. The  
45 trial is registered with the Australia and New Zealand Clinical Trial Register  
46 (ACTRN12610000650099).  
47  
48  
49  
50  
51  
52  
53  
54  
55  
56  
57  
58  
59  
60

1  
2  
3  
4 The IMPROVE-CKD study includes patients from 17 nephrology sites in Australia, New  
5 Zealand and Malaysia with CKD stage 3b and stage 4, aged over 18 years old, and who have  
6 a serum phosphate level over 1.00 mmol/L (3.10 mg/dL) on at least one occasion in the 6  
7 months prior to randomization (Table 2). Patient recruitment commenced in 2012, with a plan  
8 to enrol 488 participants for a 96-week study period. During the recruitment phase of the  
9 study, changes were made to the inclusion and exclusion criteria in order to improve  
10 feasibility and generalizability of the trial. The changes and rationale are documented in  
11 Table 3.  
12  
13  
14  
15  
16  
17  
18  
19  
20  
21  
22  
23  
24  
25  
26  
27  
28  
29  
30  
31  
32  
33  
34  
35  
36  
37  
38  
39  
40  
41  
42  
43  
44  
45  
46  
47  
48  
49  
50  
51  
52  
53  
54  
55  
56  
57  
58  
59  
60

Table 2. Inclusion and Exclusion Criteria for the IMPROVE-CKD study

|                                                                                                                                                                                                                                                                                                                                                                                                                                                                                                                                                                                                                                                                                                                                                                                                                                                                                                                                                                       |
|-----------------------------------------------------------------------------------------------------------------------------------------------------------------------------------------------------------------------------------------------------------------------------------------------------------------------------------------------------------------------------------------------------------------------------------------------------------------------------------------------------------------------------------------------------------------------------------------------------------------------------------------------------------------------------------------------------------------------------------------------------------------------------------------------------------------------------------------------------------------------------------------------------------------------------------------------------------------------|
| <p><b>Inclusion criteria</b></p> <ol style="list-style-type: none"><li>1. Patients with CKD stages 3b and 4 (eGFR between 15 and 45 ml/min/1.73m<sup>2</sup>)*</li><li>2. Serum phosphate &gt; 1.00 mmol/L (3.10 mg/dL) on at least one occasion in the previous 6 months</li><li>3. 18 years or over</li><li>4. Able to give informed consent</li></ol>                                                                                                                                                                                                                                                                                                                                                                                                                                                                                                                                                                                                              |
| <p><b>Exclusion criteria</b></p> <ol style="list-style-type: none"><li>1. Patients with a history of psychological illness or condition which interferes with their ability to understand or comply with the requirements of the study</li><li>2. Renal transplantation</li><li>3. Recent (within 1 month) hospitalization or cardiovascular event</li><li>4. Pregnancy or breast feeding</li><li>5. Medical conditions that impact on phosphate metabolism (apart from CKD), e.g. primary hyperparathyroidism or hypoparathyroidism; previous subtotal parathyroidectomy; gastrointestinal malabsorption disorders such as Crohn's disease, ulcerative colitis, coeliac disease or severe liver dysfunction</li><li>6. Malnutrition, defined as serum albumin &lt; 30 g/L</li><li>7. Serum phosphate ≤ 0.8 mmol/L (2.48 mg/dL) at screening</li><li>8. Atrial fibrillation as documented on ECG performed at screening</li><li>9. Inability to perform PWV</li></ol> |

\*eGFR determined using the CKD-Epidemiology Collaboration (CKD-EPI) equation



1  
2  
3  
4 Abbreviations: CKD, chronic kidney disease; ECG, electrocardiogram; eGFR, estimated glomerular filtration  
5 rate  
6  
7  
8  
9  
10  
11  
12  
13  
14  
15  
16  
17  
18  
19  
20  
21  
22  
23  
24  
25  
26  
27  
28  
29  
30  
31  
32  
33  
34  
35  
36  
37  
38  
39  
40  
41  
42  
43  
44  
45  
46  
47  
48  
49  
50  
51  
52  
53  
54  
55  
56  
57  
58  
59  
60

Table 3. Protocol amendments for the IMPROVE-CKD study

|                                      |                                                                                                                                                                                                                                                                                                                                                                                                                                                                                                           |                                                                                                                                                                                                                                                                                                                                                                                                                                                                                                                                                                             |                                                                                                                                                                                                                                                                                                                                                                                                                                                                                                           |
|--------------------------------------|-----------------------------------------------------------------------------------------------------------------------------------------------------------------------------------------------------------------------------------------------------------------------------------------------------------------------------------------------------------------------------------------------------------------------------------------------------------------------------------------------------------|-----------------------------------------------------------------------------------------------------------------------------------------------------------------------------------------------------------------------------------------------------------------------------------------------------------------------------------------------------------------------------------------------------------------------------------------------------------------------------------------------------------------------------------------------------------------------------|-----------------------------------------------------------------------------------------------------------------------------------------------------------------------------------------------------------------------------------------------------------------------------------------------------------------------------------------------------------------------------------------------------------------------------------------------------------------------------------------------------------|
| <b>Issue and version of protocol</b> | Albuminuria/Proteinuria; Changes between Protocol versions 1.0 to 2.0                                                                                                                                                                                                                                                                                                                                                                                                                                     | Serum phosphate level; Changes between Protocol versions 1.0 to 2.0 to 3.0                                                                                                                                                                                                                                                                                                                                                                                                                                                                                                  | Pulse wave velocity; Changes between Protocol versions 2.0 to 3.0                                                                                                                                                                                                                                                                                                                                                                                                                                         |
| <b>Protocol amendment</b>            | Initial inclusion criteria were urine albumin/creatinine ratio (ACR) >10mg/mmol or protein/creatinine ratio (PCR) >15mg/mmol.<br><br>These criteria were subsequently removed.                                                                                                                                                                                                                                                                                                                            | Inclusion criterion was initially for serum phosphate level >1.2mmol/L (3.72mg/dL) at screening, but was changed to >1.2mmol/L on at least one occasion over the previous 6 months.<br><br>The serum phosphate level was then subsequently reduced from >1.2mmol/L to >1.0mmol/L (3.10mg/dL) on at least one occasion over the previous 6 months.                                                                                                                                                                                                                           | Exclusion criterion was added as inability to obtain a PWV measure.                                                                                                                                                                                                                                                                                                                                                                                                                                       |
| <b>Rationale for change</b>          | The initial introduction of these criteria was to increase the proportion of CKD 3b/4 subjects who were at greater risk of cardiovascular disease as well as increased risk of progression of renal impairment. Review of screening logs showed that albuminuria/proteinuria were the commonest exclusion criteria, therefore these were removed as they were not considered essential, posed a significant impediment to recruitment, and the population for recruitment was already deemed at increased | The window for serum phosphate results to screen eligible patients was initially changed to be within the previous 6 months due to fluctuations above and below levels of 1.2mmol/L. This change was made to improve study recruitment by broadening the population of suitable participants. Trial screening log review continued to show that this inclusion criterion was a major barrier to patient eligibility for the study and therefore the level was reduced to 1.0mmol/L. This change was not thought to adversely affect the study outcomes because although the | As the trial progressed, a small percentage of the population was noted on whom a PWV reading could not be obtained. This was therefore added as an exclusion criterion in order to ensure the power of the study is not compromised by including individuals whose PWV is unattainable at screening. It is increasingly recognised that even for experienced operators, there is a small percentage of the population on whom PWV cannot be obtained. This has been documented on other studies (24-26). |

|  |                                                                                                                                                                                                                                                                                            |                                                                                                                                                                                                                                                                                                                                                                      |  |
|--|--------------------------------------------------------------------------------------------------------------------------------------------------------------------------------------------------------------------------------------------------------------------------------------------|----------------------------------------------------------------------------------------------------------------------------------------------------------------------------------------------------------------------------------------------------------------------------------------------------------------------------------------------------------------------|--|
|  | <p>cardiovascular risk regardless of albuminuria/proteinuria. Also, for this study, pulse wave velocity (PWV) is the primary surrogate end point and there is only one publication which links albuminuria/proteinuria to PWV, so this association is not considered significant (27).</p> | <p>study is using a phosphate binder as an intervention, the primary purpose of the study is the attenuation of cardiovascular outcomes. A lower phosphate level was added as an exclusion criterion to ensure that patients with very low phosphate levels are not included into the study where further phosphate reduction may adversely affect their health.</p> |  |
|--|--------------------------------------------------------------------------------------------------------------------------------------------------------------------------------------------------------------------------------------------------------------------------------------------|----------------------------------------------------------------------------------------------------------------------------------------------------------------------------------------------------------------------------------------------------------------------------------------------------------------------------------------------------------------------|--|

### ***Experimental intervention***

Lanthanum carbonate (Fosrenol) is a commercial product of Shire Pharmaceuticals for the treatment of hyperphosphatemia (28). Upon ingestion, lanthanum ions are released from the carbonate as a result of gastric acid secretion in the upper gastrointestinal tract and bind to dietary phosphate. The compound lanthanum phosphate is insoluble and lanthanum carbonate has been shown to effectively reduce the absorption of dietary phosphate in the CKD population. In comparison to calcium-based phosphate binders, lanthanum carbonate has additional benefits of reduced incident hypercalcemia (29). Lanthanum has been studied in both pre-dialysis and dialysis patients, with significant reduction in serum phosphate in both patient groups.

The long-term safety of lanthanum carbonate in patients with CKD has been reported, with randomised prospective studies revealing no evidence of bone accumulation or liver toxicity (30, 31), and after more than 850 000 person-years of worldwide patient exposure, there is no evidence that lanthanum carbonate is associated with adverse safety outcomes in CKD patients (30).

### ***Treatment randomisation***

Participants are randomized 1:1 to two arms involving lanthanum carbonate 500mg three times daily with meals or matching placebo three times daily with meals for 96 weeks. Study medication is up-titrated by local investigators to a total dose of six tablets daily (3000mg/day lanthanum carbonate) if serum phosphate remains persistently greater than 1.60 mmol/L (4.95 mg/dL). Randomization is by a covariate-adaptive algorithm minimising imbalance across treatments arms in age, presence of diabetes, study site and CKD stage and

1  
2  
3  
4 implemented via web-based access to a central electronic randomization system provided by  
5  
6 The George Institute in Sydney, Australia.  
7  
8  
9

### 10 11 *Study procedures* 12

13  
14 Patients who meet the eligibility criteria and provide written informed consent undergo a  
15  
16 baseline visit. A site screening log records the number of participants screened who are  
17  
18 potentially eligible to participate and the reasons for ineligibility and for non-participation if  
19  
20 eligible. Potentially eligible participants already receiving a phosphate binder at screening  
21  
22 undergo a 2-week washout period before attending the baseline visit. Tables 4 and 5 outline  
23  
24 the study schedule visits and laboratory outcome measures for the 96-week trial. Pill counts  
25  
26 will be undertaken at study visits to assess adherence to study medication.  
27  
28  
29  
30  
31  
32

33 Use of concomitant medications in this study will be as per standard of clinical care. Oral  
34  
35 vitamin D administration, both 1,25 dihydroxy vitamin D (calcitriol) and nutritional vitamin  
36  
37 D (cholecalciferol), is allowed and can be prescribed at the discretion of the treating  
38  
39 physician. Calcitriol may be administered to study patients to treat secondary  
40  
41 hyperparathyroidism or hypocalcemia as indicated, with a maximal dose of 0.25mcg (one  
42  
43 tablet) per day.  
44  
45  
46  
47  
48

49 In addition to the maximal titrated study medication, calcium, magnesium or aluminium-  
50  
51 based phosphate binders can be prescribed for persistent hyperphosphatemia at the discretion  
52  
53 of the local investigator (recommended for progressive or persistent serum phosphate levels  
54  
55  $>1.60\text{mmol/L}$ ); and because these are the only available phosphate lowering agents for pre-  
56  
57  
58  
59  
60

1  
2  
3  
4 dialysis CKD patients in Australia, New Zealand and Malaysia, this trial will have no  
5  
6 potential drop-ins.  
7  
8  
9

10  
11 The IMPROVE-CKD study is being overseen by the Trial Steering Committee (TSC) and  
12 centrally coordinated by the Australasian Kidney Trials Network (AKTN) (Appendix). The  
13 safety of participants is overseen by an independent Data Safety Monitoring Board (DSMB,  
14 Appendix). Participants, investigators, the AKTN coordinating centre staff and outcome  
15 assessors are all blinded to the treatment assignment in the IMPROVE-CKD study. Any  
16 serious adverse event will be reported to the AKTN within one working day of investigators  
17 becoming aware of the event; and investigators will be required to report any adverse event  
18 leading to discontinuation of the study drug. Monitors from the AKTN will review patients'  
19 records regularly to ensure that all endpoints and serious adverse events will be reported. The  
20 DSMB will assess unblinded data to safeguard participant interests and enhance the integrity  
21 of the trial.  
22  
23  
24  
25  
26  
27  
28  
29  
30  
31  
32  
33  
34  
35  
36  
37  
38  
39  
40  
41  
42  
43  
44  
45  
46  
47  
48  
49  
50  
51  
52  
53  
54  
55  
56  
57  
58  
59  
60

Table 4. Schedule of visits for the IMPROVE-CKD study

| Visits                                                    | Screening/<br>Randomisation | Baseline | Weeks post-baseline<br>(Study visit window is $\pm 14$ days of due date from baseline) |                    |                    |                     |                     |                     |                     |                 |
|-----------------------------------------------------------|-----------------------------|----------|----------------------------------------------------------------------------------------|--------------------|--------------------|---------------------|---------------------|---------------------|---------------------|-----------------|
|                                                           |                             |          | Week 12                                                                                | week 24            | week 36            | week 48             | week 60             | week 72             | week 84             | week 96         |
|                                                           |                             |          | Visit 1<br>Month 3                                                                     | Visit 2<br>Month 6 | Visit 3<br>Month 9 | Visit 4<br>Month 12 | Visit 5<br>Month 15 | Visit 6<br>Month 18 | Visit 7<br>Month 21 | END<br>Month 24 |
| <b>Visit Assessments</b>                                  |                             |          |                                                                                        |                    |                    |                     |                     |                     |                     |                 |
| Informed Consent                                          | X                           |          |                                                                                        |                    |                    |                     |                     |                     |                     |                 |
| Participant randomised                                    | X                           |          |                                                                                        |                    |                    |                     |                     |                     |                     |                 |
| Electrocardiogram (ECG)                                   | X                           |          |                                                                                        |                    |                    |                     |                     |                     |                     |                 |
| Demographics and Medical History                          |                             | X        |                                                                                        |                    |                    |                     |                     |                     |                     |                 |
| Physical Examination                                      |                             | X        |                                                                                        | X                  |                    | X                   |                     | X                   |                     | X               |
| Concomitant Medications                                   |                             | X        | X                                                                                      | X                  | X                  | X                   | X                   | X                   | X                   | X               |
| CT scan – multi-slice, non-contrast *                     |                             | X        |                                                                                        |                    |                    |                     |                     |                     |                     | X               |
| Pulse Wave Velocity and Augmentation Index                | X                           |          |                                                                                        | X                  |                    | X                   |                     | X                   |                     | X               |
| Cardiac MRI * (for participating sites)                   |                             | X        |                                                                                        |                    |                    |                     |                     |                     |                     | X               |
| Medication dispensed                                      |                             | X        | X                                                                                      | X                  | X                  | X                   | X                   | X                   | X                   |                 |
| Medication returned                                       |                             |          | X                                                                                      | X                  | X                  | X                   | X                   | X                   | X                   | X               |
| Adverse Events recorded (SAEs and ADRs)                   |                             |          | X                                                                                      | X                  | X                  | X                   | X                   | X                   | X                   | X               |
| Dietitian assisted food record^ (for participating sites) |                             | X        |                                                                                        |                    |                    | X                   |                     |                     |                     | X               |

\* if participants withdraw from the study after 12 months and prior to 24 months they will be requested to do a 'close-out' CT and MRI scan. Some sites will also perform additional MRI scans to investigate diastolic dysfunction

^ for participants enrolled in the dietary component of the study

**Abbreviations:** CT, computed tomography; MRI, magnetic resonance imaging, ADRs, adverse drug reactions; SAEs, serious adverse events

Table 5. Laboratory outcome measures in the IMPROVE-CKD study

| Visits                                               | Screening/<br>Randomisation | Baseline | Weeks post-baseline<br>(Laboratory test window is ±14 days from visit date) |                    |                    |                     |                     |                     |                     |                 |
|------------------------------------------------------|-----------------------------|----------|-----------------------------------------------------------------------------|--------------------|--------------------|---------------------|---------------------|---------------------|---------------------|-----------------|
|                                                      |                             |          | Week 12                                                                     | week 24            | week 36            | week 48             | week 60             | week 72             | week 84             | week 96         |
|                                                      |                             |          | Visit 1<br>Month 3                                                          | Visit 2<br>Month 6 | Visit 3<br>Month 9 | Visit 4<br>Month 12 | Visit 5<br>Month 15 | Visit 6<br>Month 18 | Visit 7<br>Month 21 | END<br>Month 24 |
| <b>Locally Tested Laboratory Assessments</b>         |                             |          |                                                                             |                    |                    |                     |                     |                     |                     |                 |
| Full Blood Count                                     |                             | X        | X                                                                           | X                  | X                  | X                   | X                   | X                   | X                   | X               |
| Biochemistry, Renal and Liver Function Tests         |                             | X        | X                                                                           | X                  | X                  | X                   | X                   | X                   | X                   | X               |
| C-reactive Protein (CRP)                             |                             | X        | X                                                                           | X                  | X                  | X                   | X                   | X                   | X                   | X               |
| Fasting Serum Lipid Profile                          |                             | X        |                                                                             | X                  |                    | X                   |                     | X                   |                     | X               |
| Fasting Glucose                                      |                             | X        |                                                                             | X                  |                    | X                   |                     | X                   |                     | X               |
| HbA1c *                                              |                             | X        |                                                                             | X                  |                    | X                   |                     | X                   |                     | X               |
| Intact Parathyroid Hormone (iPTH)                    |                             | X        |                                                                             | X                  |                    | X                   |                     | X                   |                     | X               |
| Other Liver Function Tests                           |                             | X        |                                                                             |                    |                    | X                   |                     |                     |                     | X               |
| Iron studies                                         |                             | X        |                                                                             |                    |                    | X                   |                     |                     |                     | X               |
| Vitamin D (25-D)                                     |                             | X        |                                                                             |                    |                    | X                   |                     |                     |                     | X               |
| Spot urine (ACR, PCR and Phosphate:creatinine ratio) |                             | X        |                                                                             |                    |                    | X                   |                     |                     |                     | X               |
| 24 Hour Urine collection – timed excretion           |                             | X        |                                                                             |                    |                    | X                   |                     |                     |                     | X               |
| <b>Centrally Tested Laboratory Assessments</b>       |                             |          |                                                                             |                    |                    |                     |                     |                     |                     |                 |
| Fibroblast growth factor-23 (FGF-23)                 |                             | X        |                                                                             | X                  |                    | X                   |                     | X                   |                     | X               |
| Asymmetrical dimethyl arginine (ADMA)                |                             | X        |                                                                             |                    |                    | X                   |                     |                     |                     | X               |
| Calcification inhibitors (OPG, MGP, fetuin-A)        |                             | X        |                                                                             | X                  |                    | X                   |                     | X                   |                     | X               |
| Vitamin D binding protein                            |                             | X        |                                                                             |                    |                    | X                   |                     |                     |                     | X               |

\* Only performed in patients with diabetes

Abbreviations: ACR, albumin:creatinine ratio; PCR, protein:creatinine ratio; MGP, matrix Gla protein; OPG, osteoprotegerin



### ***Primary outcome***

The primary outcome of the IMPROVE-CKD study is change in large arterial compliance (as measured by carotid-femoral PWV) at 96 weeks after randomization to lanthanum carbonate or placebo. Hyperphosphatemia has been associated with reduced arterial compliance and multiple studies have reported a positive relationship between serum phosphate and PWV (8, 32). PWV has been used to measure arterial compliance and is considered to be a valid surrogate for cardiovascular morbidity and mortality (33, 34). PWV also correlates with CKD stage and increases as CKD progresses (35, 36). In the IMPROVE-CKD study, arterial compliance is being measured using a SphygmoCor device (AtCor, PWV Inc., Westmead, Sydney, Australia) with determination of carotid-femoral PWV. Carotid-femoral PWV measures the interval between pulse waves at the carotid and femoral arteries, with higher values representing stiffer vessels. In studies of patients with CKD, mean inter-observer and day-to-day reproducibility of PWV measurements have been reported to be acceptable, with differences of 0.3 +/- 3.2 m/s and -0.7 +/- 1.9 m/s in some studies (37). Pulse wave analysis is also being measured using augmentation index (AI) by the SphygmoCor device as an additional outcome. AI represents the difference between early and late systolic peaks of the systolic pulse wave contour, divided by pulse pressure (%). All PWV and AI readings will be reviewed at a central cardiac laboratory by trained study investigators blinded to patient details and study medication.

### ***Secondary Outcomes***

#### ***Vascular calcification***

Abdominal aortic calcification is being determined using computed tomography (CT) at baseline and 96 weeks in the IMPROVE-CKD study. If patients exit the study after 12

1  
2  
3  
4 months, they will be invited to have an early exit CT scan. Aortic calcification is estimated to  
5  
6 be present in approximately 60% of patients with CKD stages 4 and 5, and increases in those  
7  
8 on dialysis, with progressive disease related to dialysis vintage (38). Aortic calcification is  
9  
10 related to the presence of other vascular disease, as well as to serum phosphate and PTH  
11  
12 levels. There is an association of aortic calcification and arterial compliance, with  
13  
14 correlations between calcium scoring via CT and PWV (32). CT images will be centrally  
15  
16 reviewed for calcification scores by a trained radiologist and radiographer blinded to patient  
17  
18 details and study medication.  
19  
20  
21  
22

### 23 *Left ventricular hypertrophy*

24  
25 PWV has been associated with increased left ventricular mass and the development of  
26  
27 diastolic dysfunction in hypertensive patients (39). However, left ventricular mass has also  
28  
29 been associated with the development of hyperphosphatemia independent of PWV (7). In the  
30  
31 IMPROVE-CKD study, cardiac magnetic resonance imaging (MRI), the gold standard to  
32  
33 evaluate the development of left ventricular hypertrophy, is being used to measure left  
34  
35 ventricular mass on a sub-cohort of participants at baseline and 96 weeks. If a patient exits  
36  
37 the study after 12 months, they will be invited to have an exit MRI. MRI images will be  
38  
39 centrally reviewed by cardiologists trained in cardiac MRI and blinded to patient details and  
40  
41 study medication.  
42  
43  
44  
45  
46

### 47 *Biochemical parameters*

48  
49 Serum phosphate, calcium and PTH are being assessed at individual sites throughout the 96-  
50  
51 week study period. FGF-23 is being measured 6-monthly using intact and c-terminal FGF-23  
52  
53 assays and will be centrally analyzed. Changes in urinary phosphate excretion are also being  
54  
55 evaluated using 24-hour urine collections. Standard biochemical measurements are being  
56  
57  
58  
59  
60

1  
2  
3  
4 performed in hospital laboratories with appropriate regulatory accreditation to monitor for  
5  
6 adverse reactions. Serum and urine samples will also be collected at several time points for  
7  
8 exploratory analyses.  
9

### 10 11 12 13 *Dietary phosphate*

14  
15  
16 A dietary sub-study is included within IMPROVE CKD, to analyse daily dietary phosphate  
17  
18 intake using a questionnaire at entry, 52 and 96-week visits. Diet is the main source of  
19  
20 exogenous phosphate, and dietary phosphate restriction is recommended in treatment  
21  
22 algorithms prior to initiation of phosphate binder therapy (1).  
23  
24  
25  
26  
27

### 28 29 *Bone mineral density*

30  
31 Bone mineral density (BMD) is also being determined from the aortic CT images at baseline  
32  
33 and at 96 weeks (40). Due to the complexity of CKD-MBD and lack of evidence-based  
34  
35 treatment to manage renal bone disease, BMD as determined by dual-energy x-ray  
36  
37 absorptiometry (DXA) has not been utilized routinely to predict fracture risk or monitor  
38  
39 therapy. Low BMD, as a marker of osteoporosis and renal osteodystrophy, however, is a  
40  
41 considerable component of CKD-MBD and recent prospective trials have reported that low  
42  
43 BMD of the femoral neck and total hip in pre-dialysis CKD patients is associated with  
44  
45 increased fracture rates (41). Improvement in BMD has been reported with the use of  
46  
47 phosphate binders in contrast to placebo (21) and therefore BMD is an important additional  
48  
49 outcome for the IMPROVE-CKD study.  
50  
51  
52  
53  
54

### 55 *Statistical Considerations*

56  
57  
58  
59  
60

### *Sample size*

The study is designed to detect a clinically meaningful difference of 1 m/s in PWV between the study groups at 96 weeks. Assuming a within group standard deviation of 2.9 m/s, a sample size of 356 patients would detect a 1 m/s difference in PWV at the 5% significance level with 90% statistical power. To account for an estimated 10% study withdrawal rate and 10% non-adherence rate, recruitment of 488 participants is anticipated to be required. No allowance was made for drop-ins given there is no provision for lanthanum carbonate to be accessed in the pre-dialysis CKD population in Australia, New Zealand and Malaysia.

### *Analysis*

Outcome data from all randomized participants will be analysed according to the intention-to-treat principle. The effect of lanthanum carbonate on PWV at 96 weeks will be estimated using analysis of covariance (ANCOVA) to adjust for baseline PWV values. Subgroup analyses will be performed according to CKD stage (3b vs 4), age groups (<60 years, ≥60 years), presence of diabetes mellitus, and levels of serum phosphate (quartiles) by examining treatment by subgroup interactions in linear regression models. Differences in other continuous variables between the lanthanum and placebo groups will be analysed by ANCOVA adjusting for baseline measurements. Differences in the percentage change in Agatston scores between the study arms are not expected to be normally distributed and will be analysed using the Wilcoxon rank sum test. Differences between treatment groups on other categorical variables will be analysed using chi-square tests.

### *Patient and public involvement*

1  
2  
3  
4 Patients and the public were not initially involved in the development of this study protocol.  
5  
6 However, there was a consumer representative on the AKTN Scientific Committee which  
7  
8 reviewed the protocol, provided input and approved the study before it commenced  
9  
10 recruitment.  
11  
12  
13  
14

### 15 ***Ethics and dissemination***

16  
17  
18 Ethical approval for the IMPROVE-CKD trial was obtained by each local Institutional Ethics  
19  
20 Committee (IEC) for each participating site prior to study commencement. This study is  
21  
22 being conducted in accordance with the Declaration of Helsinki, the National Health and  
23  
24 Medical Research Committee (NHMRC) statement on Human Experimentation, Joint  
25  
26 NHMRC/AVCC statement and Guidelines on Practical Research, applicable ICH guidelines  
27  
28 and the Therapeutic Goods Administration (TGA). Results of the IMPROVE-CKD study,  
29  
30 including exploratory outcomes, will be disseminated through publications in international  
31  
32 peer-reviewed journals and presentations at local, national and international scientific  
33  
34 conferences. Results will also be disseminated to all study participants in the form of a clear  
35  
36 and detailed description of the outcomes, which will be specifically consumer-focused.  
37  
38  
39  
40  
41  
42

### 43 **Discussion**

44  
45  
46 A recent systematic review and meta-analysis which evaluated evidence for correlation  
47  
48 between the effects of CKD-MBD medications, such as phosphate binders, on biochemical  
49  
50 parameters as well as on patient-level end-points of cardiovascular disease and mortality in  
51  
52 patients with CKD (28 studies, 6,999 participants), reported that effects on serum phosphate  
53  
54 levels were weakly and imprecisely correlated with all-cause and cardiovascular death (42).  
55  
56  
57  
58  
59  
60

1  
2  
3  
4 The authors of this meta-analysis concluded that, as existing data did not exclude a mortality  
5 benefit with treatment, trials are needed to address patient-centred outcomes to evaluate drug  
6 effectiveness in CKD-MBD (42). Another recent network meta-analysis of 77 RCTs that  
7 assessed the effects of different phosphate binders on mortality, cardiovascular disease and  
8 biochemical parameters (involving 12,562 CKD patients), reported no evidence that any class  
9 of phosphate binder lowered mortality or cardiovascular events when compared to placebo  
10 (43). The vast majority of studies however involved dialysis patients (62 trials, 11,009  
11 patients) and most trials were generally of short duration (median 6 months) with high risks  
12 of bias. Again, these studies highlight the need for further RCTs involving phosphate-  
13 lowering in patients with CKD not on dialysis, with longer duration of intervention and  
14 assessment of outcomes beyond changes in biochemical parameters of CKD-MBD.  
15  
16  
17  
18  
19  
20  
21  
22  
23  
24  
25  
26  
27  
28  
29

30 The IMPROVE-CKD study, an international, multi-centre RCT, plans to determine if  
31 lanthanum carbonate compared to placebo will improve or attenuate arterial compliance and  
32 reduce the progression of aortic calcification in patients with CKD. Reduced arterial  
33 compliance and increased vascular calcification are significant issues for patients with CKD,  
34 by contributing to their greater cardiovascular morbidity and mortality. At present, there are  
35 no treatment options that are proven to improve arterial stiffness or reduce vascular  
36 calcification for patients with CKD-MBD, and the cautious recommendations of international  
37 clinical guidelines reflects this lack of evidence. The IMPROVE-CKD study will provide  
38 evidence for or against the value of the phosphate binder lanthanum carbonate to affect the  
39 rate of change of aortic PWV and aortic calcification. Should this study not achieve a  
40 separation in serum phosphate values between the two arms of the trial, any differences in  
41 outcomes may reflect differences in FGF-23. FGF-23 levels at 96 weeks might be expected to  
42  
43  
44  
45  
46  
47  
48  
49  
50  
51  
52  
53  
54  
55  
56  
57  
58  
59  
60

1  
2  
3  
4 differ between study arms, because FGF-23 is reported to fall with lanthanum carbonate  
5  
6 therapy; although this relationship has not been demonstrated consistently (44, 45).  
7  
8  
9

10  
11 A recent open-labelled clinical trial randomized 120 patients with CKD stages 3-4 (and  
12  
13 serum phosphate >1.47 mmol/L [4.6 mg/dL]) to either lanthanum carbonate, calcium acetate  
14  
15 or dietary phosphate restriction for 12 months (46). For the 102 patients who completed the  
16  
17 trial, assessment of biochemical parameters, including FGF-23, as well as vascular  
18  
19 parameters of coronary artery calcification, PWV, and endothelial dysfunction (as measured  
20  
21 by reactive hyperemia index), demonstrated no difference in change of any outcome from  
22  
23 baseline to 12 months between the three study arms, except for PTH which was suppressed  
24  
25 more in those on calcium-based phosphate binders. Overall, there was also a mild reduction  
26  
27 in bone-specific alkaline phosphatase (ALP) between baseline and 12 months when results  
28  
29 from all measures to reduce phosphate absorption were combined, which may potentially  
30  
31 suggest improved bone turnover with phosphate lowering. This study however raises further  
32  
33 concerns about the lack of proven benefits of phosphate-lowering therapy in the non-dialysis  
34  
35 CKD population.  
36  
37  
38  
39  
40  
41  
42

43 There is a growing understanding of circadian rhythm and the variability in relation to serum  
44  
45 phosphate levels, with recent appreciation for the contribution of the nicotinamide  
46  
47 phosphoribosyltransferase (Nampt)/nicotinamide adenine dinucleotide (NAD) system to the  
48  
49 regulation of sodium-phosphate cotransporters. Nampt is a regulator of the intracellular NAD  
50  
51 pool and this pathway is involved in renal and intestinal expression of sodium-dependent  
52  
53 phosphate transporters (47). One of the potential reasons for the commonly observed  
54  
55 heterogeneity in response to phosphate binders may be due to inter-individual variability in  
56  
57  
58  
59  
60

transcellular phosphate movement (48). Circadian variation in serum phosphate may not be regulated by hormones but determined by the Nampt/NAD system, which affects cellular shifts and renal and intestinal phosphate transport; and the time of day serum phosphate is measured may be critical to determining treatment effect with interventions directed at regulating serum phosphate. Morning serum phosphate is now considered less helpful when assessing any change from interventions, with the best time to detect a difference in the afternoon. One crossover feeding study in patients with CKD reported the circadian pattern of serum phosphate with the lowest concentrations at 0800 hours and highest at 1600 (49). Therefore, the effect of lanthanum carbonate on serum phosphate levels may or may not indicate a treatment effect, however this contributes to the rationale for why the IMPROVE-CKD study is assessing outcome measures other than serum phosphate to assess efficacy, and these other measures will more accurately reflect the impact of modifying phosphate homeostasis.

### ***Clinical implications of the study***

If the use of lanthanum carbonate in the IMPROVE-CKD study has a beneficial effect on surrogates for cardiovascular disease, this will provide support for the current hypothesis that phosphate binders and control of hyperphosphatemia may mitigate adverse cardiovascular outcomes in patients with CKD. Although a larger trial would be required to demonstrate a benefit on mortality, the use of surrogate cardiovascular outcomes should provide clinicians with improved evidence regarding treatment strategies. Importantly, this study using lanthanum carbonate, a non-calcium-based phosphate binder, allows for a more accurate assessment of the effect of phosphate binding strategies on vascular calcification, without the complication of an exogenous calcium load. This may provide evidence for the role of non-calcium-based binders in the pre-dialysis CKD population, and help inform CKD-MBD



1  
2  
3  
4 guidelines that currently lack strong evidence for phosphate control in CKD stages 3-5. In  
5  
6 addition, the IMPROVE-CKD study will provide valuable information regarding the  
7  
8 relationship between phosphate, FGF-23, arterial compliance and calcification in patients  
9  
10 with CKD.  
11  
12  
13  
14  
15

### 16 **Author Contributions**

17 All authors (NDT, EP, NL, CMH, GJE, EMP, AV, SVB, GAB, NCB, KC, JDC, SC, RJF,  
18 SGH, LSH, DJ, MJJ, DWJ, PGK, KKL, AM, VP, KRP, CAP, DR, LR, ERS, RJW, and  
19 AYMW) were involved in study design and concept. NDT, EP, NL, CMH, GJE, EMP, AV  
20 and SVB drafted the manuscript, and all authors approved the final version of the manuscript.  
21  
22  
23  
24  
25

### 26 **Funding/Support**

27 The IMPROVE-CKD study was funded by grants from the National Health and Medical  
28 Research Council (NHMRC) of Australia Project Grant (APP1044302); NHMRC Enabling  
29 Grant (ID 631731); NHMRC Programme Grant (APP1092957); and Shire Pharmaceuticals  
30 Development Limited Clinical Trial Contribution. Study medication (lanthanum carbonate  
31 and matching placebo) was supplied by Shire Pharmaceuticals.  
32  
33  
34  
35  
36  
37

### 38 **Disclaimer**

39 The funders had no role in the study design; writing of the report; or the decision to submit  
40 the report for publication.  
41  
42  
43  
44

### 45 **Competing interests**

46 NDT has received honoraria, travel support and research funding from Amgen, Shire and  
47 Sanofi. CMH has received research funding from Amgen and Shire. GJE has received  
48 honoraria, travel support and research funding from Amgen and Sanofi. SGH has received  
49 honoraria, travel support and research funding from Amgen and Sanofi. DWJ has received  
50 honoraria, travel support or research funding from Amgen and Sanofi. DWJ has received  
51 consultancy fees from Sanofi, travel support from Amgen and is a current recipient of an  
52  
53  
54  
55  
56  
57  
58  
59  
60

1  
2  
3  
4 Australian National Health and Medical Research Council Practitioner Fellowship. ERS has  
5 received research funding from Amgen and Sanofi and owns stock in Calciscon.  
6  
7  
8  
9

## 10 **References**

- 11  
12  
13 1. Kidney Disease: Improving Global Outcomes (KDIGO) CKD-MBD Work Group.  
14 KDIGO clinical practice guideline for the diagnosis, evaluation, prevention, and treatment of  
15 Chronic Kidney Disease–Mineral and Bone Disorder (CKD-MBD). *Kidney Int Suppl.* 2009;  
16 113: S1-130.  
17  
18  
19  
20  
21
- 22 2. Fort J. Chronic Renal Failure: A Cardiovascular Risk Factor. *Kidney Int*  
23 2005;68(99):S25-S29.  
24  
25
- 26 3. Hruska K, Mathew S, Lund R, Fang Y, Sugatani T. Cardiovascular risk factors in  
27 chronic kidney disease: does phosphate qualify? *Kidney Int* 2011;79:S9-S13.  
28  
29
- 30 4. Jamal SA, Vandermeer B, Raggi P, Mendelssohn DC, Chatterley T, Dorgan M, et al.  
31 Effect of calcium-based versus non-calcium-based phosphate binders on mortality in patients  
32 with chronic kidney disease: an updated systematic review and meta-analysis. *The Lancet*  
33 2013;382(9900):1268-1277.  
34  
35  
36  
37  
38
- 39 5. Patel L, Bernard LM, Elder GJ. Sevelamer versus calcium-based binders for treatment  
40 of hyperphosphatemia in CKD: A meta-analysis of randomized controlled trials. *Clin J Am*  
41 *Soc Nephrol.* 2016 Feb 5;11(2):232-44  
42  
43  
44
- 45 6. Tonelli M, Sacks F, Pfeffer M, Gao Z, Curhan G. Cholesterol And Recurrent Events  
46 Trial Investigators. Relation between serum phosphate level and cardiovascular event rate in  
47 people with coronary disease. *Circulation* 2005;112:2627-2633.  
48  
49  
50  
51  
52  
53  
54  
55  
56  
57  
58  
59  
60

- 1  
2  
3  
4 7. Chue CD, Edwards NC, Moody WE, Steeds RP, Townend JN, Ferro CJ. Serum  
5 phosphate is associated with left ventricular mass in patients with chronic kidney disease: a  
6 cardiac magnetic resonance study. *Heart* 2012;98(3):219.  
7  
8
- 9  
10 8. Six I, Maizel J, Barreto FC, Rangrez AY, Dupont S, Slama M, et al. Effects of  
11 phosphate on vascular function under normal conditions and influence of the uraemic state.  
12 *Cardiovasc Res* 2012;96(1):130-139.  
13  
14
- 15 9. Jüppner H. Phosphate and FGF-23. *Kidney Int* 2011;79:S24-S27.  
16  
17
- 18 10. Ozkok A, Kekik C, Karahan GE, Sakaci T, Ozel A, Unsal A, et al. FGF-23 associated  
19 with the progression of coronary artery calcification in hemodialysis patients. *BMC Nephrol*  
20 2013;14:241-241.  
21  
22
- 23 11. Isakova T, Ix JH, Sprague SM, Raphael KL, Fried L, Gassman JJ, et al. Rationale and  
24 approaches to phosphate and fibroblast growth factor 23 reduction in CKD. *J Am Soc*  
25 *Nephrol* 2015;26(10):2328-2339.  
26  
27
- 28 12. Kimura K, Saika Y, Otani H, Fujii R, Mune M, Yukawa S. Factors associated with  
29 calcification of the abdominal aorta in hemodialysis patients. *Kidney Int Suppl.*  
30 1999;71:S238-41.  
31  
32
- 33 13. Moe SM, Chen NX. Mechanisms of vascular calcification in chronic kidney disease. *J*  
34 *Am Soc Nephrol* 2008;19(2):213-216.  
35  
36
- 37 14. Nasrallah MM, El-Shehaby AR, Salem MM, Osman NA, El Sheikh E, Sharaf El Din  
38 UAA. Fibroblast growth factor-23 (FGF-23) is independently correlated to aortic  
39 calcification in haemodialysis patients. *Nephrol Dial Transplant* 2010;25(8):2679-2685.  
40  
41
- 42 15. Scialla JJ, Lau WL, Reilly MP, Isakova T, Yang HY, Crouthamel MH, et al.  
43 Fibroblast growth factor 23 is not associated with and does not induce arterial calcification.  
44 *Kidney Int* 2013;83(6):1159-68.  
45  
46  
47  
48  
49  
50  
51  
52  
53  
54  
55  
56  
57  
58  
59  
60

16. Habbous S, Przech S, Acedillo R, Sarma S, Garg AX, Martin J. The efficacy and safety of sevelamer and lanthanum versus calcium-containing and iron-based binders in treating hyperphosphatemia in patients with chronic kidney disease: a systematic review and meta-analysis. *Nephrol Dial Transplant* 2017;32(1):111-125.
17. KDIGO-KMUCG. KDIGO 2017 clinical practice guideline update for the diagnosis, evaluation, prevention, and treatment of Chronic Kidney Disease—Mineral and Bone Disorder (CKD-MBD). *Kidney Int Suppl.* 2017;7:1-59.
18. Lopes AA, Tong L, Thumma J, Li Y, Fuller DS, Morgenstern H, et al. Phosphate binder use and mortality among hemodialysis patients in the Dialysis Outcomes and Practice Patterns Study (DOPPS): Evaluation of possible confounding by nutritional status. *Am J Kidney Dis* 2012;60(1):90-101.
19. Isakova T, Gutiérrez OM, Chang Y, Shah A, Tamez H, Smith K, et al. Phosphorus binders and survival on hemodialysis. *J Am Soc Nephrol* 2009;20(2):388-396.
20. Fernández-Martín JL, Carrero JJ, Benedik M, Bos W-J, Covic A, Ferreira A, et al. COSMOS: the dialysis scenario of CKD-MBD in Europe. *Nephrol Dial Transplant* 2013;28(7):1922-1935.
21. Block GA, Wheeler DC, Persky MS, Kestenbaum B, Ketteler M, Spiegel DM, et al. Effects of phosphate binders in moderate CKD. *J Am Soc Nephrol* 2012;23(8):1407-1415.
22. Chue CD, Townend JN, Moody WE, Zehnder D, Wall NA, Harper L, et al. Cardiovascular effects of sevelamer in stage 3 CKD. *J Am Soc Nephrol* 2013;24(5):842-852.
23. Seifert ME, de las Fuentes L, Rothstein M, Dietzen DJ, Bierhals AJ, Cheng SC, et al. Effects of phosphate binder therapy on vascular stiffness in early-stage chronic kidney disease. *Am J Nephrol* 2013;38(2):158-167.

- 1  
2  
3  
4 24. Dart AM, Gatzka CD, Cameron JD, Kingwell BA, Liang YL, Berry KL, Reid CM,  
5  
6 Jennings GL. Large artery stiffness is not related to plasma cholesterol in older subjects with  
7  
8 hypertension. *Arterioscler Thromb Vasc Biol* 2001;24:962-968.  
9
- 10 25. Mitchell GF, Hwang SJ, Vasan RS, Larson MG, Pencina MJ, Hamburg NM, Vita JA,  
11  
12 Levy D, Benjamin EJ. Arterial stiffness and cardiovascular events: the Framingham heart  
13  
14 study. *Circulation* 2010;121:505-511.  
15
- 16 26. Dart AM, Cameron JD, Gatzka CD, Willson K, Liang YL, Berry KL, et al. Similar  
17  
18 effects of treatment on central and brachial blood pressures in polder hypertensive subjects in  
19  
20 the second Australian national blood pressure trial. *Hypertension* 2007;49:1242-1247.  
21
- 22 27. McIntyre NJ, Fluck RJ, McIntyre CW, Fakis A, Taal MW. Determinants of arterial  
23  
24 stiffness in chronic kidney disease stage 3. *PLoS One*. 2013;8(1):e55444.  
25
- 26 28. Harrison TS, Scott LJ. Lanthanum Carbonate. *Drugs* 2004;64(9):985-996.  
27
- 28 29. Zhang C, Wen J, Li Z, Fan J. Efficacy and safety of lanthanum carbonate on chronic  
29  
30 kidney disease—mineral and bone disorder in dialysis patients: a systematic review. *BMC*  
31  
32 *Nephrol* 2013;14:226-226.  
33
- 34 30. Hutchison AJ, Wilson RJ, Garafola S, Copley JB. Lanthanum carbonate: safety data  
35  
36 after 10 years. *Nephrology (Carlton)*. 2016;21(12):987-994.  
37
- 38 31. Zhai CJ, Yang XY, Sun J, Wang R. Efficacy and safety of lanthanum carbonate  
39  
40 versus calcium-based phosphate binders in patients with chronic kidney disease: a systematic  
41  
42 review and meta-analysis. *Int Urol Nephrol*. 2015;47(3):527-35.  
43
- 44 32. Toussaint ND, Lau KK, Strauss BJ, Polkinghorne KR, Kerr PG. Associations between  
45  
46 vascular calcification, arterial stiffness and bone mineral density in chronic kidney disease.  
47  
48 *Nephrol Dial Transplant* 2008;23(2):586-593.  
49
- 50 33. Pannier B, Guérin AP, Marchais SJ, Safar ME, London GM. Stiffness of capacitive  
51  
52 and conduit arteries. *Hypertension* 2005;45(4):592.  
53  
54  
55  
56  
57  
58  
59  
60

- 1  
2  
3  
4 34. Blacher J, Guerin AP, Pannier B, Marchais SJ, Safar ME, London GM. Impact of  
5 aortic stiffness on survival in end-stage renal disease. *Circulation* 1999;99(18):2434.  
6  
7  
8 35. Tholen S, Klofat K, Pan Cheng R, Schmaderer C, Lutz J, Heemann U, et al.  
9 Progression of aortic pulse wave velocity in patients with chronic kidney disease. *J Clin*  
10 *Hypertens* 2013;15(11):833-838.  
11  
12  
13  
14 36. Townsend RR, Anderson AH, Chirinos JA, Feldman HI, Grunwald JE, Nessel L, et  
15 al. Association of pulse wave velocity with chronic kidney disease progression and mortality:  
16 Findings from the CRIC Study (Chronic Renal Insufficiency Cohort). *Hypertension*  
17 2018;71(6):1101-1107.  
18  
19  
20  
21 37. Frimodt-Møller M, Nielsen AH, Kamper A-L, Strandgaard S. Reproducibility of  
22 pulse-wave analysis and pulse-wave velocity determination in chronic kidney disease.  
23 *Nephrol Dial Transplant* 2008;23(2):594-600.  
24  
25  
26  
27 38. Raggi P, Boulay A, Chasan-Taber S, Amin N, Dillon M, Burke SK, et al. Cardiac  
28 calcification in adult hemodialysis patients: A link between end-stage renal disease and  
29 cardiovascular disease? *J Am Coll Cardiol* 2002;39(4):695-701.  
30  
31  
32  
33 39. Brandts A, van Elderen SGC, Westenberg JJM, van der Grond J, van Buchem MA,  
34 Huisman MV, et al. Association of aortic arch pulse wave velocity with left ventricular mass  
35 and lacunar brain infarcts in hypertensive patients: assessment with MR imaging. *Radiology*  
36 2009;253(3):681-688.  
37  
38  
39  
40 40. Lee SJ, Binkley N, Lubner MG, Bruce RJ, Ziemlewicz TJ, Pickhardt PJ.  
41 Opportunistic screening for osteoporosis using the sagittal reconstruction from routine  
42 abdominal CT for combined assessment of vertebral fractures and density. *Osteoporos Int.*  
43 2016;27(3):1131-1136.  
44  
45  
46  
47  
48  
49  
50  
51  
52  
53  
54  
55  
56  
57  
58  
59  
60

- 1  
2  
3  
4 41. Yenckel RH, Ix JH, Shlipak MG, Bauer DC, Rianon NJ, Kritchevsky SB, et al. Bone  
5 mineral density and fracture risk in older individuals with CKD. *Clin J Am Soc Nephrol*  
6 2012;7(7):1130-1136.  
7  
8  
9  
10 42. Palmer SC, Teixeira-Pinto A, Saglimbene V, Craig JC, Macaskill P, Tonelli M, et al.  
11 Association of drug effects on serum parathyroid hormone, phosphorus, and calcium levels  
12 with mortality in CKD: A meta-analysis. *Am J Kidney Dis* 2015;66(6):962-971.  
13  
14  
15  
16 43. Palmer SC, Gardner S, Tonelli M, Mavridis D, Johnson DW, Craig JC, et al.  
17 Phosphate-binding agents in adults with CKD: A network meta-analysis of randomized trials.  
18 *Am J Kidney Dis* 2016;68(5):691-702.  
19  
20  
21  
22 44. Gonzalez-Parra E, Gonzalez-Casaus ML, Galán A, Martinez-Calero A, Navas V,  
23 Rodriguez M, et al. Lanthanum carbonate reduces FGF23 in chronic kidney disease Stage 3  
24 patients. *Nephrol Dial Transplant* 2011;26(8):2567-2571.  
25  
26  
27  
28 45. Isakova T, Barchi-Chung A, Enfield G, Smith K, Vargas G, Houston J, et al. Effects  
29 of dietary phosphate restriction and phosphate binders on FGF23 levels in CKD. *Clin J Am*  
30 *Soc Nephrol* 2013;8(6):1009-1018.  
31  
32  
33  
34 46. Kovesdy CP, Lu JL, Wall BM, Gyamlani G, Naseer A, Wallick A et al. Changes with  
35 lanthanum carbonate, calcium acetate, and phosphorus restriction in CKD: A randomized  
36 controlled trial. *KI Reports* 2018;3(4):897-904.  
37  
38  
39  
40 47. Miyagawa A, Tatsumi S, Takahama W, et al. The sodium phosphate cotransporter  
41 family and nicotinamide phosphoribosyltransferase contribute to the daily oscillation of  
42 plasma inorganic phosphate concentration. *Kidney Int* 2018;93:1073–1085.  
43  
44  
45 48. Isakova T, Block G. The phosphate bucket list. *Kidney Int* 2018; 93(5):1033-1035.  
46  
47  
48  
49 49. Ix JH, Anderson CA, Smits G, Persky MS, Block GA. Effect of dietary phosphate  
50 intake on the circadian rhythm of serum phosphate concentrations in chronic kidney disease:  
51 a crossover study. *Am J Clin Nutr* 2014;100(5):1392-1397.  
52  
53  
54  
55  
56  
57  
58  
59  
60

1  
2  
3  
4  
5  
6  
7  
8  
9  
10  
11  
12  
13  
14  
15  
16  
17  
18  
19  
20  
21  
22  
23  
24  
25  
26  
27  
28  
29  
30  
31  
32  
33  
34  
35  
36  
37  
38  
39  
40  
41  
42  
43  
44  
45  
46  
47  
48  
49  
50  
51  
52  
53  
54  
55  
56  
57  
58  
59  
60

**Figures**

Figure 1. Schema of the IMPROVE-CKD trial

For peer review only



1  
2  
3  
4  
5  
6  
7  
8  
9  
10  
11  
12  
13  
14  
15  
16  
17  
18  
19  
20  
21  
22  
23  
24  
25  
26  
27  
28  
29  
30  
31  
32  
33  
34  
35  
36  
37  
38  
39  
40  
41  
42  
43  
44  
45  
46  
47  
48  
49  
50  
51  
52  
53  
54  
55  
56  
57  
58  
59  
60

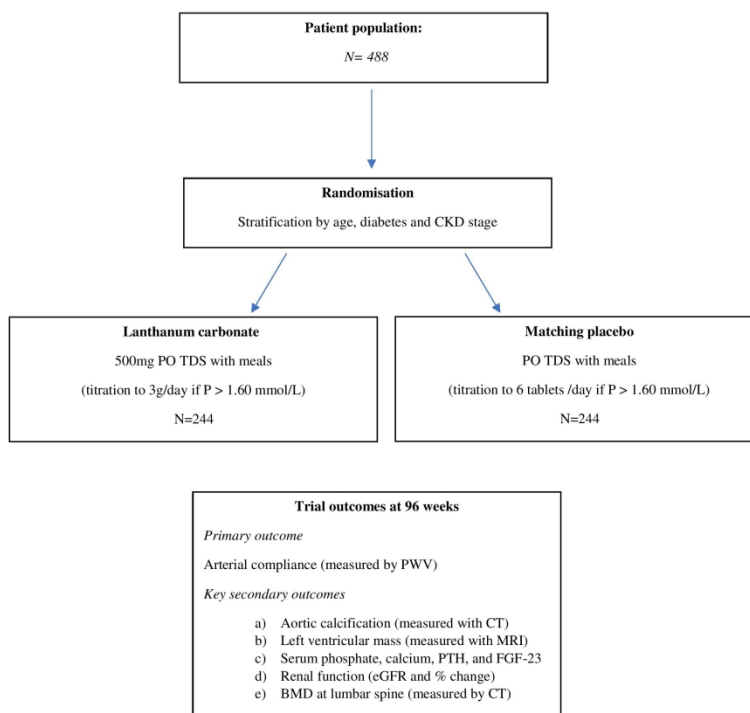

210x297mm (300 x 300 DPI)

## APPENDIX

### **Trial Steering Committee**

Nigel D Toussaint (Chair), Department of Nephrology, The Royal Melbourne Hospital, Parkville, Australia; Eugenia Pedagogos, Epworth Healthcare, Melbourne, Australia; Carmel M Hawley, Princess Alexandra Hospital, Brisbane, Australia; Grahame J Elder, Westmead Hospital, Westmead, Australia; Elaine M Pascoe, Australasian Kidney Trials Network, Brisbane, Australia; Sunil V Badve, St. George Hospital, Sydney, Australia; Geoffrey A Block, Colorado Kidney Care, Denver, United States; Neil C Boudville, Sir Charles Gairdner Hospital, Perth, Australia; Katrina Campbell, Princess Alexandra Hospital, Brisbane, Australia; James D Cameron, Monash Heart, Monash University, Clayton, Australia; Sylvia Chen, Epworth Healthcare, Melbourne, Australia; Randall J Faull, Royal Adelaide Hospital, Adelaide, Australia; Stephen G Holt, The Royal Melbourne Hospital, Parkville, Australia; Lai S Hooi, Sultanah Aminah Hospital, Johor Bahru, Malaysia; Meg J Jardine, The George Institute for Global Health, Sydney, Australia; Peter G Kerr, Monash Medical Centre, Clayton, Australia; Kenneth K Lau, Monash Medical Centre, Clayton, Australia; Vlado Perkovic, The George Institute for Global Health, Sydney, Australia; Kevan R Polkinghorne, Monash Medical Centre, Clayton, Australia; Carol A Pollock, Royal North Shore Hospital, Sydney, Australia; Donna Reidlinger, Australasian Kidney Trials Network, Brisbane, Australia; Edward R Smith, The Royal Melbourne Hospital, Parkville, Australia; Robert J Walker, Dunedin Hospital, Dunedin, New Zealand; Angela Yee Moon Wang, Queen Mary Hospital, University of Hong Kong, Hong Kong.

### **Data Safety Monitoring Board**

Bruce C Neal (Chair), Deputy Executive Director, The George Institute for Global Health, and Professor of Medicine, University of New South Wales, Sydney, Australia; Andrew B Forbes, Department of Epidemiology and Preventive Medicine, Monash University, Clayton, Australia; Christoph Wanner, Division of Nephrology and Hypertension, University Hospital of Würzburg, Germany; and David C Wheeler, Centre for Nephrology, Royal Free and University College Medical School, London, the United Kingdom.

## **Australasian Kidney Trials Network**

Australasian Kidney Trials Network (AKTN), Brisbane, Queensland, Australia

### ***Operational Team***

Carmel M Hawley (Chair, AKTN Operations Secretariat), David W Johnson (Deputy Chair, AKTN Operations Secretariat), Sunil V Badve, Yeong Jee Cho, Darsy Darssan, Magid Fahim, Rathika Krishnasamy, Alicia Morrish, Elaine M Pascoe, Peta-Anne Paul-Brent, Donna Reidlinger, Laura Robison, Anish Scaria, Andrea Valks, Liza Vergara.

### ***Executive Committee***

Carmel M Hawley (Chair), David W Johnson (Deputy Chair), Sunil V Badve, Neil C Boudville, Alan Cass, Meg J Jardine, Alicia Morrish, Elaine M Pascoe, Vlado Perkovic, Donna Reidlinger.
